# Supplementary material for: Classification of Thyroid Nodules with Stacked Denoising Sparse Autoencoder
Source: Int J Endocrinol. 2020 Dec 7;2020:9015713. doi: 10.1155/2020/9015713 (PMC7787836; doi:10.1155/2020/9015713)
Supplement: Supplementary Materials — Supplementary material is an excel file. It includes the details of the immune-related genes we used to construct the classifier. [file 9015713.f1.xlsx]

## Sheet: IRGs
ID	Symbol	Name	Synonyms	Chromosome	Category
12	SERPINA3	serpin peptidase inhibitor, clade A (alpha-1 antiproteinase, antitrypsin), member 3	AACT|ACT|GIG24|GIG25|MGC88254	14	Antimicrobials
48	ACO1	aconitase 1, soluble	ACONS|IREB1|IREBP|IREBP1|IRP1	9	Antimicrobials
58	ACTA1	actin, alpha 1, skeletal muscle	ACTA|ASMA|CFTD|CFTD1|CFTDM|MPFD|NEM1|NEM2|NEM3	1	Antimicrobials
91	ACVR1B	activin A receptor, type IB	ACTRIB|ACVRLK4|ALK4|SKR2	12	Cytokine_Receptors
92	ACVR2A	activin A receptor, type IIA	ACTRII|ACVR2	2	Cytokine_Receptors
93	ACVR2B	activin A receptor, type IIB	ACTRIIB|ActR-IIB|MGC116908	3	Cytokine_Receptors
94	ACVRL1	activin A receptor type II-like 1	ACVRLK1|ALK-1|ALK1|HHT|HHT2|ORW2|SKR3|TSR-I	12	Cytokine_Receptors
103	ADAR	adenosine deaminase, RNA-specific	ADAR1|DRADA|DSH|DSRAD|G1P1|IFI-4|IFI4|K88dsRBP|p136	1	Antimicrobials
117	ADCYAP1R1	adenylate cyclase activating polypeptide 1 (pituitary) receptor type I	PAC1|PACAPR|PACAPRI	7	Cytokine_Receptors
133	ADM	adrenomedullin	AM	11	Cytokines
153	ADRB1	adrenergic, beta-1-, receptor	ADRB1R|B1AR|BETA1AR|RHR	10	Cytokine_Receptors
156	ADRBK1	adrenergic, beta, receptor kinase 1	BARK1|BETA-ARK1|FLJ16718|GRK2	11	Antimicrobials
177	AGER	advanced glycosylation end product-specific receptor	MGC22357|RAGE	6	Antimicrobials
181	AGRP	agouti related protein homolog (mouse)	AGRT|ART|ASIP2|MGC118963	16	Cytokines
182	JAG1	jagged 1 (Alagille syndrome)	AGS|AHD|AWS|CD339|HJ1|JAGL1|MGC104644	20	Cytokines
183	AGT	angiotensinogen (serpin peptidase inhibitor, clade A, member 8)	ANHU|FLJ92595|FLJ97926|SERPINA8	1	Cytokines
185	AGTR1	angiotensin II receptor, type 1	AG2S|AGTR1A|AGTR1B|AT1|AT1B|AT1R|AT2R1|AT2R1A|AT2R1B|HAT1R	3	Cytokine_Receptors
186	AGTR2	angiotensin II receptor, type 2	AT2|ATGR2|MRX88	X	Cytokine_Receptors
187	APLNR	apelin receptor	AGTRL1|APJ|APJR|FLJ90771|MGC45246	11	Cytokine_Receptors
190	NR0B1	nuclear receptor subfamily 0, group B, member 1	AHC|AHCH|AHX|DAX-1|DAX1|DSS|GTD|HHG|NROB1	X	Cytokine_Receptors
207	AKT1	v-akt murine thymoma viral oncogene homolog 1	AKT|MGC99656|PKB|PKB-ALPHA|PRKBA|RAC|RAC-ALPHA	14	BCRSignalingPathway
208	AKT2	v-akt murine thymoma viral oncogene homolog 2	PKBB|PKBBETA|PRKBB|RAC-BETA	19	BCRSignalingPathway
213	ALB	albumin	DKFZp779N1935|PRO0883|PRO0903|PRO1341	4	Antimicrobials
265	AMELX	amelogenin (amelogenesis imperfecta 1, X-linked)	AIH1|ALGN|AMG|AMGL|AMGX	X	Cytokines
268	AMH	anti-Mullerian hormone	MIF|MIS	19	Cytokines
284	ANGPT1	angiopoietin 1	AGP1|AGPT|ANG1	8	Cytokine_Receptors
309	ANXA6	annexin A6	ANX6|CBP68	5	Antimicrobials
332	BIRC5	baculoviral IAP repeat-containing 5	API4|EPR-1	17	Antimicrobials
350	APOH	apolipoprotein H (beta-2-glycoprotein I)	B2G1|BG	17	Antimicrobials
355	FAS	Fas (TNF receptor superfamily, member 6)	ALPS1A|APO-1|APT1|CD95|FAS1|FASTM|TNFRSF6	10	NaturalKiller_Cell_Cytotoxicity
356	FASLG	Fas ligand (TNF superfamily, member 6)	APT1LG1|CD178|CD95L|FASL|TNFSF6	1	Antimicrobials
366	AQP9	aquaporin 9	HsT17287|SSC1	15	Antimicrobials
367	AR	androgen receptor	AIS|DHTR|HUMARA|HYSP1|KD|NR3C4|SBMA|SMAX1|TFM	X	Cytokine_Receptors
369	ARAF	v-raf murine sarcoma 3611 viral oncogene homolog	A-RAF|ARAF1|PKS2|RAFA1	X	NaturalKiller_Cell_Cytotoxicity
384	ARG2	arginase, type II	-	14	Antimicrobials
387	RHOA	ras homolog gene family, member A	ARH12|ARHA|RHO12|RHOH12	3	TCRsignalingPathway
551	AVP	arginine vasopressin	ADH|ARVP|AVP-NPII|AVRP|VP	20	Cytokines
552	AVPR1A	arginine vasopressin receptor 1A	AVPR1	12	Cytokine_Receptors
553	AVPR1B	arginine vasopressin receptor 1B	AVPR3	1	Cytokine_Receptors
554	AVPR2	arginine vasopressin receptor 2	ADHR|DI1|DIR|DIR3|MGC126533|MGC138386|NDI|V2R	X	Cytokine_Receptors
563	AZGP1	alpha-2-glycoprotein 1, zinc-binding	ZA2G|ZAG	7	Antigen_Processing_and_Presentation
566	AZU1	azurocidin 1	AZAMP|AZU|CAP37|HBP|HUMAZUR|NAZC	19	Antimicrobials
567	B2M	beta-2-microglobulin	-	15	Antigen_Processing_and_Presentation
602	BCL3	B-cell CLL/lymphoma 3	BCL4|D19S37	19	Antimicrobials
608	TNFRSF17	tumor necrosis factor receptor superfamily, member 17	BCM|BCMA|CD269	16	Cytokine_Receptors
627	BDNF	brain-derived neurotrophic factor	MGC34632	11	Cytokines
637	BID	BH3 interacting domain death agonist	FP497|MGC15319|MGC42355	22	NaturalKiller_Cell_Cytotoxicity
643	CXCR5	chemokine (C-X-C motif) receptor 5	BLR1|CD185|MDR15|MGC117347	11	Chemokine_Receptors
649	BMP1	bone morphogenetic protein 1	FLJ44432|PCOLC|PCP|TLD|pCP-2	8	Cytokines
650	BMP2	bone morphogenetic protein 2	BMP2A	20	Cytokines
651	BMP3	bone morphogenetic protein 3	BMP-3A	4	Cytokines
652	BMP4	bone morphogenetic protein 4	BMP2B|BMP2B1|MCOPS6|OFC11|ZYME	14	Cytokines
653	BMP5	bone morphogenetic protein 5	MGC34244	6	Cytokines
654	BMP6	bone morphogenetic protein 6	VGR|VGR1	6	Cytokines
655	BMP7	bone morphogenetic protein 7	OP-1	20	Cytokines
657	BMPR1A	bone morphogenetic protein receptor, type IA	10q23del|ACVRLK3|ALK3|CD292|SKR5	10	Cytokine_Receptors
658	BMPR1B	bone morphogenetic protein receptor, type IB	ALK-6|ALK6|CDw293	4	Cytokine_Receptors
659	BMPR2	bone morphogenetic protein receptor, type II (serine/threonine kinase)	BMPR-II|BMPR3|BMR2|BRK-3|FLJ41585|FLJ76945|PPH1|T-ALK	2	Cytokine_Receptors
670	BPHL	biphenyl hydrolase-like (serine hydrolase)	BPH-RP|MCNAA|MGC125930|MGC41865|VACVASE	6	Antimicrobials
671	BPI	bactericidal/permeability-increasing protein	-	20	Antimicrobials
673	BRAF	v-raf murine sarcoma viral oncogene homolog B1	B-RAF1|BRAF1|FLJ95109|MGC126806|MGC138284|RAFB1	7	NaturalKiller_Cell_Cytotoxicity
684	BST2	bone marrow stromal cell antigen 2	CD317	19	Antimicrobials
685	BTC	betacellulin	-	4	Cytokines
695	BTK	Bruton agammaglobulinemia tyrosine kinase	AGMX1|AT|ATK|BPK|IMD1|MGC126261|MGC126262|PSCTK1|XLA	X	BCRSignalingPathway
719	C3AR1	complement component 3a receptor 1	AZ3B|C3AR|HNFAG09	12	Cytokine_Receptors
727	C5	complement component 5	CPAMD4|FLJ17816|FLJ17822|MGC142298	9	Chemokines
733	C8G	complement component 8, gamma polypeptide	C8C|MGC142186	9	Antimicrobials
795	S100G	S100 calcium binding protein G	CABP1|CABP9K|CALB3|MGC138379	X	Antimicrobials
796	CALCA	calcitonin-related polypeptide alpha	CALC1|CGRP|CGRP-I|CGRP1|CT|KC|MGC126648	11	Cytokines
797	CALCB	calcitonin-related polypeptide beta	CALC2|CGRP-II|CGRP2|FLJ30166	11	Cytokines
799	CALCR	calcitonin receptor	CRT|CTR|CTR1	7	Cytokine_Receptors
811	CALR	calreticulin	CRT|FLJ26680|RO|SSA|cC1qR	19	Antigen_Processing_and_Presentation
820	CAMP	cathelicidin antimicrobial peptide	CAP18|CRAMP|FALL-39|FALL39|HSD26|LL37	3	Antimicrobials
821	CANX	calnexin	CNX|FLJ26570|IP90|P90	5	Antigen_Processing_and_Presentation
836	CASP3	caspase 3, apoptosis-related cysteine peptidase	CPP32|CPP32B|SCA-1	4	NaturalKiller_Cell_Cytotoxicity
847	CAT	catalase	MGC138422|MGC138424	11	Cytokines
867	CBL	Cas-Br-M (murine) ecotropic retroviral transforming sequence	C-CBL|CBL2|RNF55	11	TCRsignalingPathway
868	CBLB	Cas-Br-M (murine) ecotropic retroviral transforming sequence b	DKFZp686J10223|DKFZp779A0729|DKFZp779F1443|FLJ36865|FLJ41152|Nbla00127|RNF56	3	TCRsignalingPathway
885	CCK	cholecystokinin	MGC117187	3	Cytokines
909	CD1A	CD1a molecule	CD1|FCB6|HTA1|R4|T6	1	Antigen_Processing_and_Presentation
910	CD1B	CD1b molecule	CD1|CD1A|MGC125990|MGC125991|R1	1	Antigen_Processing_and_Presentation
911	CD1C	CD1c molecule	BDCA1|CD1|CD1A|R7	1	Antigen_Processing_and_Presentation
912	CD1D	CD1d molecule	CD1A|MGC34622|R3	1	Antigen_Processing_and_Presentation
913	CD1E	CD1e molecule	CD1A|R2	1	Antigen_Processing_and_Presentation
915	CD3D	CD3d molecule, delta (CD3-TCR complex)	CD3-DELTA|T3D	11	TCRsignalingPathway
916	CD3E	CD3e molecule, epsilon (CD3-TCR complex)	FLJ18683|T3E|TCRE	11	TCRsignalingPathway
917	CD3G	CD3g molecule, gamma (CD3-TCR complex)	CD3-GAMMA|FLJ17620|FLJ17664|FLJ79544|FLJ94613|MGC138597|T3G	11	TCRsignalingPathway
919	CD247	CD247 molecule	CD3-ZETA|CD3H|CD3Q|CD3Z|T3Z|TCRZ	1	NaturalKiller_Cell_Cytotoxicity
920	CD4	CD4 molecule	CD4mut	12	Antigen_Processing_and_Presentation
925	CD8A	CD8a molecule	CD8|Leu2|MAL|p32	2	Antigen_Processing_and_Presentation
926	CD8B	CD8b molecule	CD8B1|LYT3|Leu2|Ly3|MGC119115	2	Antigen_Processing_and_Presentation
929	CD14	CD14 molecule	-	5	Antimicrobials
933	CD22	CD22 molecule	FLJ22814|MGC130020|SIGLEC-2|SIGLEC2	19	BCRSignalingPathway
940	CD28	CD28 molecule	MGC138290|Tp44	2	TCRsignalingPathway
942	CD86	CD86 molecule	B7-2|B70|CD28LG2|LAB72|MGC34413	3	Antimicrobials
943	TNFRSF8	tumor necrosis factor receptor superfamily, member 8	CD30|D1S166E|Ki-1	1	Cytokine_Receptors
944	TNFSF8	tumor necrosis factor (ligand) superfamily, member 8	CD153|CD30L|CD30LG|MGC138144	9	Cytokines
958	CD40	CD40 molecule, TNF receptor superfamily member 5	Bp50|CDW40|MGC9013|TNFRSF5|p50	20	Antimicrobials
959	CD40LG	CD40 ligand	CD154|CD40L|HIGM1|IGM|IMD3|T-BAM|TNFSF5|TRAP|gp39|hCD40L	X	Antimicrobials
962	CD48	CD48 molecule	BCM1|BLAST|BLAST1|MEM-102|SLAMF2|hCD48|mCD48	1	NaturalKiller_Cell_Cytotoxicity
970	CD70	CD70 molecule	CD27L|CD27LG|TNFSF7	19	Cytokines
971	CD72	CD72 molecule	CD72b|LYB2	9	BCRSignalingPathway
972	CD74	CD74 molecule, major histocompatibility complex, class II invariant chain	DHLAG|HLADG|Ia-GAMMA	5	Antigen_Processing_and_Presentation
973	CD79A	CD79a molecule, immunoglobulin-associated alpha	IGA|MB-1	19	BCRSignalingPathway
974	CD79B	CD79b molecule, immunoglobulin-associated beta	B29|IGB	17	BCRSignalingPathway
975	CD81	CD81 molecule	S5.7|TAPA1|TSPAN28	11	Antimicrobials
989	43715	septin 7	CDC10|CDC3|Nbla02942|SEPT7A	7	Antimicrobials
998	CDC42	cell division cycle 42 (GTP binding protein, 25kDa)	CDC42Hs|G25K	1	TCRsignalingPathway
999	CDH1	cadherin 1, type 1, E-cadherin (epithelial)	Arc-1|CD324|CDHE|ECAD|LCAM|UVO	16	Antimicrobials
1019	CDK4	cyclin-dependent kinase 4	CMM3|MGC14458|PSK-J3	12	TCRsignalingPathway
1071	CETP	cholesteryl ester transfer protein, plasma	HDLCQ10	16	Antimicrobials
1081	CGA	glycoprotein hormones, alpha polypeptide	CG-ALPHA|FSHA|GPHA1|GPHa|HCG|LHA|TSHA	6	Cytokines
1113	CHGA	chromogranin A (parathyroid secretory protein 1)	CGA	14	Cytokines
1118	CHIT1	chitinase 1 (chitotriosidase)	CHI3|CHIT|FLJ00314|MGC125322	1	Antimicrobials
1147	CHUK	conserved helix-loop-helix ubiquitous kinase	IKBKA|IKK-alpha|IKK1|IKKA|NFKBIKA|TCF16	10	BCRSignalingPathway
1215	CMA1	chymase 1, mast cell	CYH|MCT1|MGC119890|MGC119891|chymase	14	Chemokines
1230	CCR1	chemokine (C-C motif) receptor 1	CD191|CKR-1|CKR1|CMKBR1|HM145|MIP1aR|SCYAR1	3	Antimicrobials
1232	CCR3	chemokine (C-C motif) receptor 3	CC-CKR-3|CD193|CKR3|CMKBR3|MGC102841	3	Antimicrobials
1233	CCR4	chemokine (C-C motif) receptor 4	CC-CKR-4|CD194|CKR4|CMKBR4|ChemR13|HGCN:14099|K5-5|MGC88293	3	Antimicrobials
1234	CCR5	chemokine (C-C motif) receptor 5	CC-CKR-5|CCCKR5|CD195|CKR-5|CKR5|CMKBR5|FLJ78003|IDDM22	3	Antimicrobials
1236	CCR7	chemokine (C-C motif) receptor 7	BLR2|CD197|CDw197|CMKBR7|EBI1	17	Antimicrobials
1237	CCR8	chemokine (C-C motif) receptor 8	CDw198|CKR-L1|CKRL1|CMKBR8|CMKBRL2|CY6|GPR-CY6|MGC129966|MGC129973|TER1	3	Antimicrobials
1238	CCBP2	chemokine binding protein 2	CCR10|CCR9|CMKBR9|D6|MGC126678|MGC138250|hD6	3	Antimicrobials
1240	CMKLR1	chemokine-like receptor 1	CHEMERINR|ChemR23|DEZ|MGC126105|MGC126106	12	Chemokine_Receptors
1241	LTB4R	leukotriene B4 receptor	BLT1|BLTR|CMKRL1|GPR16|LTB4R1|LTBR1|P2RY7|P2Y7	14	Antimicrobials
1271	CNTFR	ciliary neurotrophic factor receptor	MGC1774	9	Cytokine_Receptors
1326	MAP3K8	mitogen-activated protein kinase kinase kinase 8	COT|EST|ESTF|FLJ10486|TPL2|Tpl-2|c-COT	10	TCRsignalingPathway
1364	CLDN4	claudin 4	CPE-R|CPER|CPETR|CPETR1|WBSCR8|hCPE-R	7	Antimicrobials
1380	CR2	complement component (3d/Epstein Barr virus) receptor 2	C3DR|CD21|SLEB9	1	BCRSignalingPathway
1382	CRABP2	cellular retinoic acid binding protein 2	CRABP-II|RBP6	1	Antimicrobials
1385	CREB1	cAMP responsive element binding protein 1	CREB|MGC9284	2	Antigen_Processing_and_Presentation
1392	CRH	corticotropin releasing hormone	CRF	8	Cytokines
1394	CRHR1	corticotropin releasing hormone receptor 1	CRF-R|CRF1|CRFR1|CRH-R1h|CRHR|CRHR1f	17	Cytokine_Receptors
1395	CRHR2	corticotropin releasing hormone receptor 2	CRFR2	7	Cytokine_Receptors
1401	CRP	C-reactive protein, pentraxin-related	MGC149895|MGC88244|PTX1	1	Antimicrobials
1432	MAPK14	mitogen-activated protein kinase 14	CSBP1|CSBP2|CSPB1|EXIP|Mxi2|PRKM14|PRKM15|RK|SAPK2A|p38|p38ALPHA	6	Antimicrobials
1435	CSF1	colony stimulating factor 1 (macrophage)	MCSF|MGC31930	1	Cytokines
1436	CSF1R	colony stimulating factor 1 receptor	C-FMS|CD115|CSFR|FIM2|FMS	5	Cytokine_Receptors
1437	CSF2	colony stimulating factor 2 (granulocyte-macrophage)	GMCSF|MGC131935|MGC138897	5	Cytokines
1438	CSF2RA	colony stimulating factor 2 receptor, alpha, low-affinity (granulocyte-macrophage)	CD116|CDw116|CSF2R|CSF2RAX|CSF2RAY|CSF2RX|CSF2RY|GM-CSF-R-alpha|GMCSFR|GMR|MGC3848|MGC4838	X|Y	Cytokine_Receptors
1439	CSF2RB	colony stimulating factor 2 receptor, beta, low-affinity (granulocyte-macrophage)	CD131|CDw131|IL3RB|IL5RB	22	Cytokine_Receptors
1440	CSF3	colony stimulating factor 3 (granulocyte)	G-CSF|GCSF|MGC45931	17	Cytokines
1441	CSF3R	colony stimulating factor 3 receptor (granulocyte)	CD114|GCSFR	1	Cytokine_Receptors
1445	CSK	c-src tyrosine kinase	MGC117393	15	Antimicrobials
1465	CSRP1	cysteine and glycine-rich protein 1	CRP|CRP1|CSRP|CYRP|D1S181E|DKFZp686M148	1	Antimicrobials
1489	CTF1	cardiotrophin 1	CT-1|CT1	16	Cytokines
1490	CTGF	connective tissue growth factor	CCN2|HCS24|IGFBP8|MGC102839|NOV2	6	Cytokines
1510	CTSE	cathepsin E	CATE	1	Antigen_Processing_and_Presentation
1511	CTSG	cathepsin G	CG|MGC23078	14	Antimicrobials
1514	CTSL1	cathepsin L1	CATL|CTSL|FLJ31037|MEP	9	Antigen_Processing_and_Presentation
1520	CTSS	cathepsin S	MGC3886	1	Antigen_Processing_and_Presentation
1524	CX3CR1	chemokine (C-X3-C motif) receptor 1	CCRL1|CMKBRL1|CMKDR1|GPR13|GPRV28|V28	3	Chemokine_Receptors
1536	CYBB	cytochrome b-245, beta polypeptide	CGD|GP91-1|GP91-PHOX|GP91PHOX|NOX2|p91-PHOX	X	Antimicrobials
1540	CYLD	cylindromatosis (turban tumor syndrome)	CDMT|CYLD1|CYLDI|EAC|FLJ20180|FLJ31664|FLJ78684|HSPC057|KIAA0849|MFT|MFT1|SBS|TEM|USPL2	16	Antimicrobials
1616	DAXX	death-domain associated protein	BING2|DAP6|EAP1|MGC126245|MGC126246	6	Antimicrobials
1633	DCK	deoxycytidine kinase	MGC117410|MGC138632	4	Antimicrobials
1669	DEFA4	defensin, alpha 4, corticostatin	DEF4|HNP-4|HP-4|HP4|MGC120099|MGC138296	8	Antimicrobials
1671	DEFA6	defensin, alpha 6, Paneth cell-specific	DEF6|HD-6	8	Antimicrobials
1672	DEFB1	defensin, beta 1	BD1|DEFB-1|DEFB101|HBD1|MGC51822	8	Antimicrobials
1674	DES	desmin	CMD1I|CSM1|CSM2|FLJ12025|FLJ39719|FLJ41013|FLJ41793	2	Antimicrobials
1755	DMBT1	deleted in malignant brain tumors 1	GP340|MGC164738|muclin	10	Antimicrobials
1839	HBEGF	heparin-binding EGF-like growth factor	DTR|DTS|DTSF|HEGFL	5	Cytokines
1890	TYMP	thymidine phosphorylase	ECGF1|MNGIE|PDECGF|TP|hPD-ECGF	22	Chemokines
1901	S1PR1	sphingosine-1-phosphate receptor 1	CHEDG1|D1S3362|ECGF1|EDG-1|EDG1|FLJ58121|S1P1	1	Cytokine_Receptors
1907	EDN2	endothelin 2	ET2|PPET2	1	Chemokines
1908	EDN3	endothelin 3	ET3|MGC15067|MGC61498	20	Chemokines
1909	EDNRA	endothelin receptor type A	ETA|ETRA	4	Chemokine_Receptors
1910	EDNRB	endothelin receptor type B	ABCDS|ETB|ETBR|ETRB|HSCR|HSCR2	13	Chemokine_Receptors
1950	EGF	epidermal growth factor (beta-urogastrone)	HOMG4|URG	4	Cytokines
1956	EGFR	epidermal growth factor receptor (erythroblastic leukemia viral (v-erb-b) oncogene homolog, avian)	ERBB|ERBB1|HER1|PIG61|mENA	7	Cytokine_Receptors
1991	ELANE	elastase, neutrophil expressed	ELA2|GE|HLE|HNE|NE|PMN-E	19	Antimicrobials
1994	ELAVL1	ELAV (embryonic lethal, abnormal vision, Drosophila)-like 1 (Hu antigen R)	ELAV1|HUR|Hua|MelG	19	Antimicrobials
2006	ELN	elastin	FLJ38671|FLJ43523|SVAS|WBS|WS	7	Antimicrobials
2022	ENG	endoglin	CD105|END|FLJ41744|HHT1|ORW|ORW1	9	Cytokine_Receptors
2056	EPO	erythropoietin	EP|MGC138142|MVCD2	7	Cytokines
2057	EPOR	erythropoietin receptor	MGC138358	19	Cytokine_Receptors
2063	NR2F6	nuclear receptor subfamily 2, group F, member 6	EAR-2|EAR2|ERBAL2	19	Cytokine_Receptors
2069	EREG	epiregulin	ER	4	Cytokines
2099	ESR1	estrogen receptor 1	DKFZp686N23123|ER|ESR|ESRA|Era|NR3A1	6	Cytokine_Receptors
2100	ESR2	estrogen receptor 2 (ER beta)	ER-BETA|ESR-BETA|ESRB|ESTRB|Erb|NR3A2	14	Cytokine_Receptors
2103	ESRRB	estrogen-related receptor beta	DFNB35|ERR2|ERRb|ERRbeta|ERRbeta-2|ESRL2|NR3B2	14	Cytokine_Receptors
2104	ESRRG	estrogen-related receptor gamma	DKFZp781L1617|ERR3|FLJ16023|KIAA0832|NR3B3	1	Cytokine_Receptors
2149	F2R	coagulation factor II (thrombin) receptor	CF2R|HTR|PAR1|TR	5	Antimicrobials
2150	F2RL1	coagulation factor II (thrombin) receptor-like 1	GPR11|PAR2	5	Antimicrobials
2167	FABP4	fatty acid binding protein 4, adipocyte	A-FABP|aP2	8	Antimicrobials
2169	FABP2	fatty acid binding protein 2, intestinal	FABPI|I-FABP|MGC133132	4	Antimicrobials
2170	FABP3	fatty acid binding protein 3, muscle and heart (mammary-derived growth inhibitor)	FABP11|H-FABP|MDGI|O-FABP	1	Antimicrobials
2172	FABP6	fatty acid binding protein 6, ileal	I-15P|I-BABP|I-BALB|I-BAP|ILBP|ILBP3|ILLBP	5	Antimicrobials
2173	FABP7	fatty acid binding protein 7, brain	B-FABP|BLBP|DKFZp547J2313|FABPB|MRG	6	Antimicrobials
2185	PTK2B	PTK2B protein tyrosine kinase 2 beta	CADTK|CAKB|FADK2|FAK2|FRNK|PKB|PTK|PYK2|RAFTK	8	Antimicrobials
2207	FCER1G	Fc fragment of IgE, high affinity I, receptor for; gamma polypeptide	FCRG	1	Antigen_Processing_and_Presentation
2213	FCGR2B	Fc fragment of IgG, low affinity IIb, receptor (CD32)	CD32|CD32B|FCG2|FCGR2|IGFR2	1	BCRSignalingPathway
2214	FCGR3A	Fc fragment of IgG, low affinity IIIa, receptor (CD16a)	CD16|CD16A|FCG3|FCGR3|FCGRIII|FCR-10|FCRIII|FCRIIIA|IGFR3	1	NaturalKiller_Cell_Cytotoxicity
2217	FCGRT	Fc fragment of IgG, receptor, transporter, alpha	FCRN|alpha-chain	19	Antigen_Processing_and_Presentation
2220	FCN2	ficolin (collagen/fibrinogen domain containing lectin) 2 (hucolin)	EBP-37|FCNL|P35|ficolin-2	9	Antimicrobials
2243	FGA	fibrinogen alpha chain	Fib2|MGC119422|MGC119423|MGC119425	4	Antimicrobials
2246	FGF1	fibroblast growth factor 1 (acidic)	AFGF|ECGF|ECGF-beta|ECGFA|ECGFB|FGF-alpha|FGFA|GLIO703|HBGF1	5	Cytokines
2247	FGF2	fibroblast growth factor 2 (basic)	BFGF|FGFB|HBGF-2	4	Antimicrobials
2248	FGF3	fibroblast growth factor 3 (murine mammary tumor virus integration site (v-int-2) oncogene homolog)	HBGF-3|INT2	11	Cytokines
2250	FGF5	fibroblast growth factor 5	HBGF-5|Smag-82	4	Cytokines
2251	FGF6	fibroblast growth factor 6	HBGF-6|HST2	12	Cytokines
2252	FGF7	fibroblast growth factor 7 (keratinocyte growth factor)	HBGF-7|KGF	15	Cytokines
2253	FGF8	fibroblast growth factor 8 (androgen-induced)	AIGF|HBGF-8|KAL6|MGC149376	10	Cytokines
2254	FGF9	fibroblast growth factor 9 (glia-activating factor)	GAF|HBFG-9|MGC119914|MGC119915	13	Cytokines
2257	FGF12	fibroblast growth factor 12	FGF12B|FHF1	3	Cytokines
2258	FGF13	fibroblast growth factor 13	FGF2|FHF-2|FHF2	X	Cytokines
2260	FGFR1	fibroblast growth factor receptor 1	BFGFR|CD331|CEK|FGFBR|FLG|FLJ99988|FLT2|HBGFR|KAL2|N-SAM|OGD	8	Cytokine_Receptors
2261	FGFR3	fibroblast growth factor receptor 3	ACH|CD333|CEK2|HSFGFR3EX|JTK4	4	Cytokine_Receptors
2263	FGFR2	fibroblast growth factor receptor 2	BEK|BFR-1|CD332|CEK3|CFD1|ECT1|FLJ98662|JWS|K-SAM|KGFR|TK14|TK25	10	Cytokine_Receptors
2264	FGFR4	fibroblast growth factor receptor 4	CD334|JTK2|MGC20292|TKF	5	Cytokine_Receptors
2268	FGR	Gardner-Rasheed feline sarcoma viral (v-fgr) oncogene homolog	FLJ43153|MGC75096|SRC2|c-fgr|c-src2|p55c-fgr|p58c-fgr	1	Antimicrobials
2277	FIGF	c-fos induced growth factor (vascular endothelial growth factor D)	VEGF-D|VEGFD	X	Cytokines
2321	FLT1	fms-related tyrosine kinase 1 (vascular endothelial growth factor/vascular permeability factor receptor)	FLT|VEGFR1	13	Cytokine_Receptors
2322	FLT3	fms-related tyrosine kinase 3	CD135|FLK2|STK1	13	Cytokine_Receptors
2323	FLT3LG	fms-related tyrosine kinase 3 ligand	FL	19	Cytokines
2324	FLT4	fms-related tyrosine kinase 4	FLT41|LMPH1A|PCL|VEGFR3	5	Cytokine_Receptors
2358	FPR2	formyl peptide receptor 2	ALXR|FMLP-R-II|FMLPX|FPR2A|FPRH1|FPRH2|FPRL1|HM63|LXA4R	19	Chemokine_Receptors
2488	FSHB	follicle stimulating hormone, beta polypeptide	-	11	Cytokines
2492	FSHR	follicle stimulating hormone receptor	FSHRO|LGR1|MGC141667|MGC141668|ODG1	2	Cytokine_Receptors
2494	NR5A2	nuclear receptor subfamily 5, group A, member 2	B1F|B1F2|CPF|FTF|FTZ-F1|FTZ-F1beta|LRH-1|hB1F|hB1F-2	1	Cytokine_Receptors
2516	NR5A1	nuclear receptor subfamily 5, group A, member 1	AD4BP|ELP|FTZ1|FTZF1|SF-1|SF1	9	Cytokine_Receptors
2520	GAST	gastrin	GAS	17	Cytokines
2532	DARC	Duffy blood group, chemokine receptor	CCBP1|CD234|Dfy|FY|GPD|GpFy|WBCQ1	1	Chemokine_Receptors
2534	FYN	FYN oncogene related to SRC, FGR, YES	MGC45350|SLK|SYN	6	NaturalKiller_Cell_Cytotoxicity
2634	GBP2	guanylate binding protein 2, interferon-inducible	-	1	Antimicrobials
2641	GCG	glucagon	GLP1|GLP2|GRPP	2	Cytokines
2649	NR6A1	nuclear receptor subfamily 6, group A, member 1	GCNF|GCNF1|NR61|RTR	9	Cytokine_Receptors
2660	MSTN	myostatin	GDF8	2	Cytokines
2662	GDF10	growth differentiation factor 10	BMP-3b|BMP3B	10	Cytokines
2670	GFAP	glial fibrillary acidic protein	FLJ45472	17	Antimicrobials
2689	GH2	growth hormone 2	GH-V|GHL|GHV|hGH-V	17	Cytokines
2690	GHR	growth hormone receptor	GHBP	5	Cytokine_Receptors
2691	GHRH	growth hormone releasing hormone	GHRF|GRF|MGC119781	20	Cytokines
2692	GHRHR	growth hormone releasing hormone receptor	GHRFR|GHRHRpsv|GRFR	7	Cytokine_Receptors
2695	GIP	gastric inhibitory polypeptide	-	17	Cytokines
2696	GIPR	gastric inhibitory polypeptide receptor	MGC126722	19	Cytokine_Receptors
2740	GLP1R	glucagon-like peptide 1 receptor	MGC138331	6	Cytokine_Receptors
2764	GMFB	glia maturation factor, beta	GMF	14	Cytokines
2770	GNAI1	guanine nucleotide binding protein (G protein), alpha inhibiting activity polypeptide 1	Gi	7	Antimicrobials
2796	GNRH1	gonadotropin-releasing hormone 1 (luteinizing-releasing hormone)	GNRH|GRH|LHRH|LNRH	8	Cytokines
2797	GNRH2	gonadotropin-releasing hormone 2	GnRH-II|LH-RHII	20	Cytokines
2798	GNRHR	gonadotropin-releasing hormone receptor	GNRHR1|GRHR|LHRHR|LRHR	4	Cytokine_Receptors
2821	GPI	glucose phosphate isomerase	AMF|GNPI|NLK|PGI|PHI|SA-36	19	Cytokines
2833	CXCR3	chemokine (C-X-C motif) receptor 3	CD182|CD183|CKR-L2|CMKAR3|GPR9|IP10-R|Mig-R|MigR	X	Chemokine_Receptors
2840	GPR17	G protein-coupled receptor 17	DKFZp686M18273	2	Chemokine_Receptors
2852	GPER	G protein-coupled estrogen receptor 1	CEPR|CMKRL2|DRY12|FEG-1|GPCR-Br|GPR30|LERGU|LERGU2|LyGPR|MGC99678	7	Cytokine_Receptors
2885	GRB2	growth factor receptor-bound protein 2	ASH|EGFRBP-GRB2|Grb3-3|MST084|MSTP084	17	NaturalKiller_Cell_Cytotoxicity
2896	GRN	granulin	GEP|GP88|PCDGF|PEPI|PGRN	17	Antimicrobials
2908	NR3C1	nuclear receptor subfamily 3, group C, member 1 (glucocorticoid receptor)	GCCR|GCR|GR|GRL	5	Cytokine_Receptors
2919	CXCL1	chemokine (C-X-C motif) ligand 1 (melanoma growth stimulating activity, alpha)	FSP|GRO1|GROa|MGSA|MGSA-a|NAP-3|SCYB1	4	Antimicrobials
2920	CXCL2	chemokine (C-X-C motif) ligand 2	CINC-2a|GRO2|GROb|MGSA-b|MIP-2a|MIP2|MIP2A|SCYB2	4	Antimicrobials
2921	CXCL3	chemokine (C-X-C motif) ligand 3	CINC-2b|GRO3|GROg|MIP-2b|MIP2B|SCYB3	4	Antimicrobials
2922	GRP	gastrin-releasing peptide	BN|GRP-10|preproGRP|proGRP	18	Cytokines
2923	PDIA3	protein disulfide isomerase family A, member 3	ER60|ERp57|ERp60|ERp61|GRP57|GRP58|HsT17083|P58|PI-PLC	15	Antigen_Processing_and_Presentation
2932	GSK3B	glycogen synthase kinase 3 beta	-	3	BCRSignalingPathway
3002	GZMB	granzyme B (granzyme 2, cytotoxic T-lymphocyte-associated serine esterase 1)	CCPI|CGL-1|CGL1|CSP-B|CSPB|CTLA1|CTSGL1|HLP|SECT	14	NaturalKiller_Cell_Cytotoxicity
3053	SERPIND1	serpin peptidase inhibitor, clade D (heparin cofactor), member 1	D22S673|HC2|HCF2|HCII|HLS2|LS2	22	Antimicrobials
3055	HCK	hemopoietic cell kinase	JTK9	20	Antimicrobials
3065	HDAC1	histone deacetylase 1	DKFZp686H12203|GON-10|HD1|RPD3|RPD3L1	1	Antimicrobials
3068	HDGF	hepatoma-derived growth factor (high-mobility group protein 1-like)	DKFZp686J1764|FLJ96580|HMG1L2	1	Cytokines
3077	HFE	hemochromatosis	HFE1|HH|HLA-H|MGC103790|MVCD7|dJ221C16.10.1	6	Antigen_Processing_and_Presentation
3082	HGF	hepatocyte growth factor (hepapoietin A; scatter factor)	F-TCF|HGFB|HPTA|SF	7	Antimicrobials
3084	NRG1	neuregulin 1	ARIA|GGF|GGF2|HGL|HRG|HRG1|HRGA|NDF|SMDF	8	Cytokines
3105	HLA-A	major histocompatibility complex, class I, A	FLJ26655|HLAA	6	Antigen_Processing_and_Presentation
3108	HLA-DMA	major histocompatibility complex, class II, DM alpha	D6S222E|DMA|HLADM|RING6	6	Antigen_Processing_and_Presentation
3109	HLA-DMB	major histocompatibility complex, class II, DM beta	D6S221E|RING7	6	Antigen_Processing_and_Presentation
3111	HLA-DOA	major histocompatibility complex, class II, DO alpha	HLA-DNA|HLA-DZA|HLADZ	6	Antigen_Processing_and_Presentation
3112	HLA-DOB	major histocompatibility complex, class II, DO beta	DOB	6	Antigen_Processing_and_Presentation
3113	HLA-DPA1	major histocompatibility complex, class II, DP alpha 1	HLA-DP1A|HLADP|HLASB	6	Antigen_Processing_and_Presentation
3115	HLA-DPB1	major histocompatibility complex, class II, DP beta 1	DPB1|HLA-DP1B	6	Antigen_Processing_and_Presentation
3117	HLA-DQA1	major histocompatibility complex, class II, DQ alpha 1	CD|CELIAC1|DQ-A1|FLJ27088|FLJ27328|GSE|HLA-DQA|MGC149527	6	Antigen_Processing_and_Presentation
3119	HLA-DQB1	major histocompatibility complex, class II, DQ beta 1	CELIAC1|HLA-DQB|IDDM1	6	Antigen_Processing_and_Presentation
3122	HLA-DRA	major histocompatibility complex, class II, DR alpha	HLA-DRA1	6	Antigen_Processing_and_Presentation
3123	HLA-DRB1	major histocompatibility complex, class II, DR beta 1	DRB1|FLJ75017|FLJ76359|HLA-DR1B|HLA-DRB|HLA-DRB1*|SS1	6	Antigen_Processing_and_Presentation
3133	HLA-E	major histocompatibility complex, class I, E	DKFZp686P19218|EA1.2|EA2.1|HLA-6.2|MHC|QA1	6	Antigen_Processing_and_Presentation
3134	HLA-F	major histocompatibility complex, class I, F	CDA12|HLA-5.4|HLA-CDA12|HLAF	6	Antigen_Processing_and_Presentation
3135	HLA-G	major histocompatibility complex, class I, G	MHC-G	6	Antigen_Processing_and_Presentation
3140	MR1	major histocompatibility complex, class I-related	HLALS	1	Antigen_Processing_and_Presentation
3146	HMGB1	high-mobility group box 1	DKFZp686A04236|HMG1|HMG3|SBP-1	13	Antimicrobials
3162	HMOX1	heme oxygenase (decycling) 1	HO-1|HSP32|bK286B10	22	Antimicrobials
3172	HNF4A	hepatocyte nuclear factor 4, alpha	FLJ39654|HNF4|HNF4a7|HNF4a8|HNF4a9|HNF4alpha|MODY|MODY1|NR2A1|NR2A21|TCF|TCF14	20	Cytokine_Receptors
3174	HNF4G	hepatocyte nuclear factor 4, gamma	NR2A2|NR2A3	8	Cytokine_Receptors
3265	HRAS	v-Ha-ras Harvey rat sarcoma viral oncogene homolog	C-BAS/HAS|C-H-RAS|C-HA-RAS1|CTLO|H-RASIDX|HAMSV|HRAS1|K-RAS|N-RAS|RASH1	11	BCRSignalingPathway
3303	HSPA1A	heat shock 70kDa protein 1A	FLJ54303|FLJ54370|FLJ54392|FLJ54408|FLJ75127|HSP70-1|HSP70-1A|HSP70I|HSP72|HSPA1|HSPA1B	6	Antigen_Processing_and_Presentation
3305	HSPA1L	heat shock 70kDa protein 1-like	HSP70-1L|HSP70-HOM|HSP70T|hum70t	6	Antigen_Processing_and_Presentation
3308	HSPA4	heat shock 70kDa protein 4	APG-2|HS24/P52|MGC131852|RY|hsp70|hsp70RY	5	Antigen_Processing_and_Presentation
3310	HSPA6	heat shock 70kDa protein 6 (HSP70B')	-	1	Antigen_Processing_and_Presentation
3312	HSPA8	heat shock 70kDa protein 8	HSC54|HSC70|HSC71|HSP71|HSP73|HSPA10|LAP1|MGC131511|MGC29929|NIP71	11	Antigen_Processing_and_Presentation
3320	HSP90AA1	heat shock protein 90kDa alpha (cytosolic), class A member 1	FLJ31884|HSP86|HSP89A|HSP90A|HSP90N|HSPC1|HSPCA|HSPCAL1|HSPCAL4|HSPN|Hsp89|Hsp90|LAP2	14	Antigen_Processing_and_Presentation
3326	HSP90AB1	heat shock protein 90kDa alpha (cytosolic), class B member 1	D6S182|FLJ26984|HSP90-BETA|HSP90B|HSPC2|HSPCB	6	Antigen_Processing_and_Presentation
3359	HTR3A	5-hydroxytryptamine (serotonin) receptor 3A	5-HT-3|5-HT3A|5-HT3R|5HT3R|HTR3	11	Cytokine_Receptors
3371	TNC	tenascin C	HXB|MGC167029|TN	9	Chemokines
3375	IAPP	islet amyloid polypeptide	AMYLIN|DAP|IAP	12	Cytokines
3383	ICAM1	intercellular adhesion molecule 1	BB2|CD54|P3.58	19	Antigen_Processing_and_Presentation
3384	ICAM2	intercellular adhesion molecule 2	CD102	17	NaturalKiller_Cell_Cytotoxicity
3440	IFNA2	interferon, alpha 2	IFNA|INFA2|MGC125764|MGC125765	9	Antigen_Processing_and_Presentation
3441	IFNA4	interferon, alpha 4	INFA4|MGC142200	9	Antigen_Processing_and_Presentation
3445	IFNA8	interferon, alpha 8	-	9	Antigen_Processing_and_Presentation
3454	IFNAR1	interferon (alpha, beta and omega) receptor 1	AVP|IFN-alpha-REC|IFNAR|IFNBR|IFRC	21	Antimicrobials
3455	IFNAR2	interferon (alpha, beta and omega) receptor 2	IFN-R|IFN-alpha-REC|IFNABR|IFNARB	21	Antimicrobials
3456	IFNB1	interferon, beta 1, fibroblast	IFB|IFF|IFNB|MGC96956	9	Antimicrobials
3458	IFNG	interferon, gamma	IFG|IFI	12	Antigen_Processing_and_Presentation
3459	IFNGR1	interferon gamma receptor 1	CD119|FLJ45734|IFNGR	6	Antimicrobials
3460	IFNGR2	interferon gamma receptor 2 (interferon gamma transducer 1)	AF-1|IFGR2|IFNGT1	21	Cytokine_Receptors
3467	IFNW1	interferon, omega 1	-	9	Cytokines
3479	IGF1	insulin-like growth factor 1 (somatomedin C)	IGF1A|IGFI	12	Cytokines
3482	IGF2R	insulin-like growth factor 2 receptor	CD222|CIMPR|M6P-R|MPR1|MPRI	6	Cytokine_Receptors
3491	CYR61	cysteine-rich, angiogenic inducer, 61	CCN1|GIG1|IGFBP10	1	Chemokines
3551	IKBKB	inhibitor of kappa light polypeptide gene enhancer in B-cells, kinase beta	FLJ40509|IKK-beta|IKK2|IKKB|MGC131801|NFKBIKB	8	BCRSignalingPathway
3552	IL1A	interleukin 1, alpha	IL-1A|IL1|IL1-ALPHA|IL1F1	2	Antimicrobials
3553	IL1B	interleukin 1, beta	IL-1|IL1-BETA|IL1F2	2	Antimicrobials
3554	IL1R1	interleukin 1 receptor, type I	CD121A|D2S1473|IL-1R-alpha|IL1R|IL1RA|P80	2	Cytokine_Receptors
3556	IL1RAP	interleukin 1 receptor accessory protein	C3orf13|FLJ37788|IL-1RAcP|IL1R3	3	Cytokine_Receptors
3557	IL1RN	interleukin 1 receptor antagonist	ICIL-1RA|IL-1ra3|IL1F3|IL1RA|IRAP|MGC10430	2	Cytokines
3558	IL2	interleukin 2	IL-2|TCGF|lymphokine	4	Antimicrobials
3560	IL2RB	interleukin 2 receptor, beta	CD122|P70-75	22	Cytokine_Receptors
3561	IL2RG	interleukin 2 receptor, gamma (severe combined immunodeficiency)	CD132|IMD4|SCIDX|SCIDX1	X	Cytokine_Receptors
3562	IL3	interleukin 3 (colony-stimulating factor, multiple)	IL-3|MCGF|MGC79398|MGC79399|MULTI-CSF	5	Cytokines
3563	IL3RA	interleukin 3 receptor, alpha (low affinity)	CD123|IL3R|IL3RAY|IL3RX|IL3RY|MGC34174|hIL-3Ra	X|Y	Cytokine_Receptors
3565	IL4	interleukin 4	BCGF-1|BCGF1|BSF1|IL-4|MGC79402	5	Antimicrobials
3566	IL4R	interleukin 4 receptor	CD124|IL4RA	16	Cytokine_Receptors
3567	IL5	interleukin 5 (colony-stimulating factor, eosinophil)	EDF|IL-5|TRF	5	Cytokines
3568	IL5RA	interleukin 5 receptor, alpha	CD125|CDw125|HSIL5R3|IL5R|MGC26560	3	Cytokine_Receptors
3569	IL6	interleukin 6 (interferon, beta 2)	BSF2|HGF|HSF|IFNB2|IL-6	7	Antimicrobials
3570	IL6R	interleukin 6 receptor	CD126|IL-6R-1|IL-6R-alpha|IL6RA|MGC104991	1	Cytokine_Receptors
3572	IL6ST	interleukin 6 signal transducer (gp130, oncostatin M receptor)	CD130|CDw130|GP130|GP130-RAPS|IL6R-beta	5	Cytokines
3574	IL7	interleukin 7	IL-7	8	Cytokines
3575	IL7R	interleukin 7 receptor	CD127|CDW127|IL-7R-alpha|IL7RA|ILRA	5	Antimicrobials
3576	IL8	interleukin 8	CXCL8|GCP-1|GCP1|LECT|LUCT|LYNAP|MDNCF|MONAP|NAF|NAP-1|NAP1	4	Antimicrobials
3578	IL9	interleukin 9	HP40|IL-9|P40	5	Cytokines
3579	IL8RB	interleukin 8 receptor, beta	CD182|CDw128b|CMKAR2|CXCR2|IL8R2|IL8RA	2	Chemokine_Receptors
3581	IL9R	interleukin 9 receptor	CD129	X|Y	Cytokine_Receptors
3586	IL10	interleukin 10	CSIF|IL-10|IL10A|MGC126450|MGC126451|TGIF	1	Antimicrobials
3587	IL10RA	interleukin 10 receptor, alpha	CDW210A|HIL-10R|IL-10R1|IL10R	11	Cytokine_Receptors
3588	IL10RB	interleukin 10 receptor, beta	CDW210B|CRF2-4|CRFB4|D21S58|D21S66|IL-10R2	21	Cytokine_Receptors
3589	IL11	interleukin 11	AGIF|IL-11	19	Cytokines
3590	IL11RA	interleukin 11 receptor, alpha	MGC2146	9	Cytokine_Receptors
3592	IL12A	interleukin 12A (natural killer cell stimulatory factor 1, cytotoxic lymphocyte maturation factor 1, p35)	CLMF|IL-12A|NFSK|NKSF1|P35	3	Cytokines
3593	IL12B	interleukin 12B (natural killer cell stimulatory factor 2, cytotoxic lymphocyte maturation factor 2, p40)	CLMF|CLMF2|IL-12B|NKSF|NKSF2	5	Antimicrobials
3594	IL12RB1	interleukin 12 receptor, beta 1	CD212|IL-12R-BETA1|IL12RB|MGC34454	19	Cytokine_Receptors
3595	IL12RB2	interleukin 12 receptor, beta 2	-	1	Cytokine_Receptors
3596	IL13	interleukin 13	ALRH|BHR1|IL-13|MGC116786|MGC116788|MGC116789|P600	5	Antimicrobials
3597	IL13RA1	interleukin 13 receptor, alpha 1	CD213A1|IL-13Ra|NR4	X	Cytokine_Receptors
3598	IL13RA2	interleukin 13 receptor, alpha 2	CD213A2|CT19|IL-13R|IL13BP	X	Cytokine_Receptors
3600	IL15	interleukin 15	IL-15|MGC9721	4	Antimicrobials
3601	IL15RA	interleukin 15 receptor, alpha	MGC104179	10	Cytokine_Receptors
3603	IL16	interleukin 16 (lymphocyte chemoattractant factor)	FLJ16806|FLJ42735|FLJ44234|HsT19289|IL-16|LCF|prIL-16	15	Cytokines
3604	TNFRSF9	tumor necrosis factor receptor superfamily, member 9	4-1BB|CD137|CDw137|ILA|MGC2172	1	Cytokine_Receptors
3605	IL17A	interleukin 17A	CTLA8|IL-17|IL-17A|IL17	6	Antimicrobials
3606	IL18	interleukin 18 (interferon-gamma-inducing factor)	IGIF|IL-18|IL-1g|IL1F4|MGC12320	11	Antimicrobials
3611	ILK	integrin-linked kinase	DKFZp686F1765|P59	11	Antimicrobials
3620	IDO1	indoleamine 2,3-dioxygenase 1	CD107B|IDO|INDO	8	Antimicrobials
3623	INHA	inhibin, alpha	-	2	Cytokines
3624	INHBA	inhibin, beta A	EDF|FRP	7	Cytokines
3625	INHBB	inhibin, beta B	MGC157939	2	Cytokines
3627	CXCL10	chemokine (C-X-C motif) ligand 10	C7|IFI10|INP10|IP-10|SCYB10|crg-2|gIP-10|mob-1	4	Antimicrobials
3630	INS	insulin	ILPR|IRDN	11	Cytokines
3635	INPP5D	inositol polyphosphate-5-phosphatase, 145kDa	MGC104855|MGC142140|MGC142142|SHIP|SHIP1|SIP-145|hp51CN	2	BCRSignalingPathway
3640	INSL3	insulin-like 3 (Leydig cell)	MGC119818|MGC119819|RLF|RLNL	19	Cytokines
3641	INSL4	insulin-like 4 (placenta)	EPIL|PLACENTIN	9	Cytokines
3643	INSR	insulin receptor	CD220|HHF5	19	Cytokine_Receptors
3658	IREB2	iron-responsive element binding protein 2	ACO3|FLJ23381|IRP2|IRP2AD	15	Antimicrobials
3659	IRF1	interferon regulatory factor 1	IRF-1|MAR	5	Antimicrobials
3661	IRF3	interferon regulatory factor 3	-	19	Antimicrobials
3663	IRF5	interferon regulatory factor 5	SLEB10	7	Antimicrobials
3665	IRF7	interferon regulatory factor 7	IRF-7H|IRF7A	11	Antimicrobials
3669	ISG20	interferon stimulated exonuclease gene 20kDa	CD25|HEM45	15	Antimicrobials
3683	ITGAL	integrin, alpha L (antigen CD11A (p180), lymphocyte function-associated antigen 1; alpha polypeptide)	CD11A|LFA-1|LFA1A	16	NaturalKiller_Cell_Cytotoxicity
3685	ITGAV	integrin, alpha V (vitronectin receptor, alpha polypeptide, antigen CD51)	CD51|DKFZp686A08142|MSK8|VNRA	2	Antimicrobials
3689	ITGB2	integrin, beta 2 (complement component 3 receptor 3 and 4 subunit)	CD18|LAD|LCAMB|LFA-1|MAC-1|MF17|MFI7	21	NaturalKiller_Cell_Cytotoxicity
3714	JAG2	jagged 2	HJ2|SER2	14	Cytokines
3717	JAK2	Janus kinase 2	JTK10	9	Antimicrobials
3727	JUND	jun D proto-oncogene	AP-1	19	Antimicrobials
3730	KAL1	Kallmann syndrome 1 sequence	ADMLX|HHA|KAL|KALIG-1|KMS	X	Antimicrobials
3757	KCNH2	potassium voltage-gated channel, subfamily H (eag-related), member 2	ERG1|HERG|HERG1|Kv11.1|LQT2|SQT1	7	Antimicrobials
3791	KDR	kinase insert domain receptor (a type III receptor tyrosine kinase)	CD309|FLK1|VEGFR|VEGFR2	4	Cytokine_Receptors
3805	KIR2DL4	killer cell immunoglobulin-like receptor, two domains, long cytoplasmic tail, 4	CD158D|G9P|KIR103|KIR103AS	19	Antigen_Processing_and_Presentation
3818	KLKB1	kallikrein B, plasma (Fletcher factor) 1	KLK3|PPK	4	Antimicrobials
3823	KLRC3	killer cell lectin-like receptor subfamily C, member 3	NKG2-E|NKG2E	12	Antigen_Processing_and_Presentation
3824	KLRD1	killer cell lectin-like receptor subfamily D, member 1	CD94	12	Antigen_Processing_and_Presentation
3827	KNG1	kininogen 1	BDK|KNG	3	Antimicrobials
3845	KRAS	v-Ki-ras2 Kirsten rat sarcoma viral oncogene homolog	C-K-RAS|K-RAS2A|K-RAS2B|K-RAS4A|K-RAS4B|KI-RAS|KRAS1|KRAS2|NS3|RASK2	12	BCRSignalingPathway
3906	LALBA	lactalbumin, alpha-	MGC138521|MGC138523	12	Antimicrobials
3929	LBP	lipopolysaccharide binding protein	MGC22233	20	Antimicrobials
3932	LCK	lymphocyte-specific protein tyrosine kinase	YT16|p56lck|pp58lck	1	NaturalKiller_Cell_Cytotoxicity
3933	LCN1	lipocalin 1 (tear prealbumin)	MGC71975|PMFA|TP|VEGP	9	Antimicrobials
3934	LCN2	lipocalin 2	24p3|NGAL	9	Antimicrobials
3937	LCP2	lymphocyte cytosolic protein 2 (SH2 domain containing leukocyte protein of 76kDa)	SLP-76|SLP76	5	NaturalKiller_Cell_Cytotoxicity
3950	LECT2	leukocyte cell-derived chemotaxin 2	MGC126628|chm-II|chm2	5	Chemokines
3952	LEP	leptin	FLJ94114|OB|OBS	7	Antimicrobials
3953	LEPR	leptin receptor	CD295|OBR	1	Cytokine_Receptors
3973	LHCGR	luteinizing hormone/choriogonadotropin receptor	FLJ41504|LCGR|LGR2|LH/CG-R|LH/CGR|LHR|LHRHR|LSH-R	2	Cytokine_Receptors
3976	LIF	leukemia inhibitory factor (cholinergic differentiation factor)	CDF|DIA|HILDA	22	Cytokines
3977	LIFR	leukemia inhibitory factor receptor alpha	CD118|FLJ98106|FLJ99923|LIF-R|SJS2|STWS|SWS	5	Cytokine_Receptors
3987	LIMS1	LIM and senescent cell antigen-like domains 1	PINCH|PINCH1	2	Antimicrobials
4035	LRP1	low density lipoprotein-related protein 1 (alpha-2-macroglobulin receptor)	A2MR|APOER|APR|CD91|FLJ16451|IGFBP3R|LRP|MGC88725|TGFBR5	12	Antimicrobials
4049	LTA	lymphotoxin alpha (TNF superfamily, member 1)	LT|TNFB|TNFSF1	6	Antigen_Processing_and_Presentation
4050	LTB	lymphotoxin beta (TNF superfamily, member 3)	TNFC|TNFSF3|p33	6	Cytokines
4052	LTBP1	latent transforming growth factor beta binding protein 1	MGC163161	2	Antimicrobials
4053	LTBP2	latent transforming growth factor beta binding protein 2	C14orf141|LTBP3|MSTP031	14	Cytokines
4055	LTBR	lymphotoxin beta receptor (TNFR superfamily, member 3)	CD18|D12S370|LT-BETA-R|TNF-R-III|TNFCR|TNFR-RP|TNFR2-RP|TNFRSF3	12	Cytokine_Receptors
4057	LTF	lactotransferrin	GIG12|HLF2|LF	3	Antimicrobials
4067	LYN	v-yes-1 Yamaguchi sarcoma viral related oncogene homolog	FLJ26625|JTK8	8	BCRSignalingPathway
4068	SH2D1A	SH2 domain protein 1A	DSHP|EBVS|FLJ18687|FLJ92177|IMD5|LYP|MTCP1|SAP|XLP|XLPD	X	NaturalKiller_Cell_Cytotoxicity
4069	LYZ	lysozyme (renal amyloidosis)	LZM|lysozyme	12	Antimicrobials
4137	MAPT	microtubule-associated protein tau	DDPAC|FLJ31424|FTDP-17|MAPTL|MGC138549|MSTD|MTBT1|MTBT2|PPND|TAU	17	Antimicrobials
4153	MBL2	mannose-binding lectin (protein C) 2, soluble (opsonic defect)	COLEC1|HSMBPC|MBL|MBP|MBP1|MGC116832|MGC116833	10	Antimicrobials
4157	MC1R	melanocortin 1 receptor (alpha melanocyte stimulating hormone receptor)	MGC14337|MSH-R|SHEP2	16	Cytokine_Receptors
4158	MC2R	melanocortin 2 receptor (adrenocorticotropic hormone)	ACTHR|MGC125798	18	Cytokine_Receptors
4192	MDK	midkine (neurite growth-promoting factor 2)	FLJ27379|MK|NEGF2	11	Cytokines
4233	MET	met proto-oncogene (hepatocyte growth factor receptor)	AUTS9|HGFR|RCCP2|c-Met	7	Cytokine_Receptors
4254	KITLG	KIT ligand	DKFZp686F2250|KL-1|Kitl|MGF|SCF|SF|SHEP7	12	Cytokines
4261	CIITA	class II, major histocompatibility complex, transactivator	C2TA|CIITAIV|MHC2TA|NLRA	16	Antigen_Processing_and_Presentation
4277	MICB	MHC class I polypeptide-related sequence B	PERB11.2	6	Antigen_Processing_and_Presentation
4282	MIF	macrophage migration inhibitory factor (glycosylation-inhibiting factor)	GIF|GLIF|MMIF	22	Antimicrobials
4283	CXCL9	chemokine (C-X-C motif) ligand 9	CMK|Humig|MIG|SCYB9|crg-10	4	Antimicrobials
4295	MLN	motilin	MGC138519	6	Cytokines
4306	NR3C2	nuclear receptor subfamily 3, group C, member 2	MCR|MGC133092|MLR|MR	4	Cytokine_Receptors
4321	MMP12	matrix metallopeptidase 12 (macrophage elastase)	HME|MGC138506|MME	11	Antimicrobials
4352	MPL	myeloproliferative leukemia virus oncogene	C-MPL|CD110|MPLV|TPOR	1	Cytokine_Receptors
4481	MSR1	macrophage scavenger receptor 1	CD204|SCARA1|SR-A|phSR1|phSR2	8	Antimicrobials
4544	MTNR1B	melatonin receptor 1B	MEL-1B-R|MT2	11	Cytokine_Receptors
4585	MUC4	mucin 4, cell surface associated	HSA276359	3	Antimicrobials
4599	MX1	myxovirus (influenza virus) resistance 1, interferon-inducible protein p78 (mouse)	IFI-78K|IFI78|MX|MxA	21	Antimicrobials
4600	MX2	myxovirus (influenza virus) resistance 2 (mouse)	MXB	21	Antimicrobials
4690	NCK1	NCK adaptor protein 1	MGC12668|NCK|NCKalpha	3	TCRsignalingPathway
4693	NDP	Norrie disease (pseudoglioma)	EVR2|FEVR|ND	X	Cytokines
4734	NEDD4	neural precursor cell expressed, developmentally down-regulated 4	KIAA0093|MGC176705|NEDD4-1|RPF1	15	Antimicrobials
4756	NEO1	neogenin homolog 1 (chicken)	DKFZp547A066|DKFZp547B146|HsT17534|IGDCC2|NGN	15	Antimicrobials
4772	NFATC1	nuclear factor of activated T-cells, cytoplasmic, calcineurin-dependent 1	MGC138448|NF-ATC|NFAT2|NFATc	18	BCRSignalingPathway
4775	NFATC3	nuclear factor of activated T-cells, cytoplasmic, calcineurin-dependent 3	NFAT4|NFATX	16	BCRSignalingPathway
4776	NFATC4	nuclear factor of activated T-cells, cytoplasmic, calcineurin-dependent 4	NF-ATc4|NFAT3	14	BCRSignalingPathway
4790	NFKB1	nuclear factor of kappa light polypeptide gene enhancer in B-cells 1	DKFZp686C01211|EBP-1|KBF1|MGC54151|NF-kappa-B|NFKB-p105|NFKB-p50|p105|p50	4	Antimicrobials
4792	NFKBIA	nuclear factor of kappa light polypeptide gene enhancer in B-cells inhibitor, alpha	IKBA|MAD-3|NFKBI	14	BCRSignalingPathway
4793	NFKBIB	nuclear factor of kappa light polypeptide gene enhancer in B-cells inhibitor, beta	IKBB|TRIP9	19	BCRSignalingPathway
4794	NFKBIE	nuclear factor of kappa light polypeptide gene enhancer in B-cells inhibitor, epsilon	IKBE	6	BCRSignalingPathway
4800	NFYA	nuclear transcription factor Y, alpha	CBF-A|CBF-B|FLJ11236|HAP2|NF-YA	6	Antigen_Processing_and_Presentation
4801	NFYB	nuclear transcription factor Y, beta	CBF-A|CBF-B|HAP3|NF-YB	12	Antigen_Processing_and_Presentation
4802	NFYC	nuclear transcription factor Y, gamma	CBF-C|CBFC|DKFZp667G242|FLJ45775|H1TF2A|HAP5|HSM|NF-YC	1	Antigen_Processing_and_Presentation
4803	NGF	nerve growth factor (beta polypeptide)	Beta-NGF|HSAN5|MGC161426|MGC161428|NGFB	1	Cytokines
4804	NGFR	nerve growth factor receptor (TNFR superfamily, member 16)	CD271|Gp80-LNGFR|TNFRSF16|p75(NTR)|p75NTR	17	Cytokine_Receptors
4828	NMB	neuromedin B	MGC17211|MGC2277|MGC3936	15	Cytokines
4829	NMBR	neuromedin B receptor	-	6	Cytokine_Receptors
4842	NOS1	nitric oxide synthase 1 (neuronal)	IHPS1|NOS|nNOS	12	Antimicrobials
4843	NOS2	nitric oxide synthase 2, inducible	HEP-NOS|INOS|NOS|NOS2A	17	Antimicrobials
4856	NOV	nephroblastoma overexpressed gene	CCN3|IGFBP9	8	Cytokines
4878	NPPA	natriuretic peptide precursor A	ANF|ANP|ATFB6|CDD-ANF|PND	1	Cytokines
4879	NPPB	natriuretic peptide precursor B	BNP	1	Cytokines
4881	NPR1	natriuretic peptide receptor A/guanylate cyclase A (atrionatriuretic peptide receptor A)	ANPRA|ANPa|GUC2A|GUCY2A|NPRA	1	Cytokine_Receptors
4883	NPR3	natriuretic peptide receptor C/guanylate cyclase C (atrionatriuretic peptide receptor C)	ANPRC|GUCY2B|NPRC	5	Cytokine_Receptors
4893	NRAS	neuroblastoma RAS viral (v-ras) oncogene homolog	ALPS4|N-ras|NRAS1	1	BCRSignalingPathway
4902	NRTN	neurturin	NTN	19	Cytokines
4908	NTF3	neurotrophin 3	HDNF|MGC129711|NGF-2|NGF2|NT3	12	Cytokines
4922	NTS	neurotensin	NMN-125|NN|NT|NT/N|NTS1	12	Cytokines
4929	NR4A2	nuclear receptor subfamily 4, group A, member 2	HZF-3|NOT|NURR1|RNR1|TINUR	2	Cytokine_Receptors
4938	OAS1	2',5'-oligoadenylate synthetase 1, 40/46kDa	IFI-4|OIAS|OIASI	12	Antimicrobials
4973	OLR1	oxidized low density lipoprotein (lectin-like) receptor 1	CLEC8A|LOX1|SCARE1	12	Antimicrobials
4982	TNFRSF11B	tumor necrosis factor receptor superfamily, member 11b	MGC29565|OCIF|OPG|TR1	8	Cytokines
4985	OPRD1	opioid receptor, delta 1	OPRD	1	Cytokine_Receptors
4987	OPRL1	opiate receptor-like 1	KOR-3|MGC34578|NOCIR|OOR|ORL1	20	Cytokine_Receptors
4988	OPRM1	opioid receptor, mu 1	KIAA0403|LMOR|MOR|MOR1|OPRM	6	Cytokine_Receptors
5008	OSM	oncostatin M	MGC20461	22	Cytokines
5020	OXT	oxytocin, prepropeptide	MGC126890|MGC126892|OT|OT-NPI	20	Cytokines
5045	FURIN	furin (paired basic amino acid cleaving enzyme)	FUR|PACE|PCSK3|SPC1	15	Antimicrobials
5052	PRDX1	peroxiredoxin 1	MSP23|NKEFA|PAG|PAGA|PAGB|PRX1|PRXI|TDPX2	1	Antimicrobials
5058	PAK1	p21 protein (Cdc42/Rac)-activated kinase 1	MGC130000|MGC130001|PAKalpha	11	NaturalKiller_Cell_Cytotoxicity
5062	PAK2	p21 protein (Cdc42/Rac)-activated kinase 2	PAK65|PAKgamma	3	TCRsignalingPathway
5063	PAK3	p21 protein (Cdc42/Rac)-activated kinase 3	CDKN1A|MRX30|MRX47|OPHN3|PAK3beta|bPAK|hPAK3	X	TCRsignalingPathway
5122	PCSK1	proprotein convertase subtilisin/kexin type 1	BMIQ12|NEC1|PC1|PC3|SPC3	5	Antimicrobials
5133	PDCD1	programmed cell death 1	CD279|PD1|SLEB2|hPD-1|hPD-l	2	Antimicrobials
5154	PDGFA	platelet-derived growth factor alpha polypeptide	PDGF-A|PDGF1	7	Cytokines
5155	PDGFB	platelet-derived growth factor beta polypeptide (simian sarcoma viral (v-sis) oncogene homolog)	FLJ12858|PDGF2|SIS|SSV|c-sis	22	Cytokines
5156	PDGFRA	platelet-derived growth factor receptor, alpha polypeptide	CD140A|MGC74795|PDGFR2|Rhe-PDGFRA	4	Antimicrobials
5157	PDGFRL	platelet-derived growth factor receptor-like	PDGRL|PRLTS	8	Cytokines
5159	PDGFRB	platelet-derived growth factor receptor, beta polypeptide	CD140B|JTK12|PDGF-R-beta|PDGFR|PDGFR1	5	Antimicrobials
5163	PDK1	pyruvate dehydrogenase kinase, isozyme 1	-	2	TCRsignalingPathway
5179	PENK	proenkephalin	-	8	Antimicrobials
5196	PF4	platelet factor 4	CXCL4|MGC138298|SCYB4	4	Antimicrobials
5197	PF4V1	platelet factor 4 variant 1	CXCL4L1|CXCL4V1|PF4-ALT|PF4A|SCYB4V1	4	Antimicrobials
5225	PGC	progastricsin (pepsinogen C)	-	6	Antimicrobials
5228	PGF	placental growth factor	D12S1900|PGFL|PLGF|PlGF-2|SHGC-10760	14	Cytokines
5266	PI3	peptidase inhibitor 3, skin-derived	ESI|MGC13613|SKALP|WAP3|WFDC14|cementoin	20	Antimicrobials
5290	PIK3CA	phosphoinositide-3-kinase, catalytic, alpha polypeptide	MGC142161|MGC142163|PI3K|p110-alpha	3	BCRSignalingPathway
5291	PIK3CB	phosphoinositide-3-kinase, catalytic, beta polypeptide	DKFZp779K1237|MGC133043|PI3K|PI3KCB|PI3Kbeta|PIK3C1|p110-BETA	3	BCRSignalingPathway
5293	PIK3CD	phosphoinositide-3-kinase, catalytic, delta polypeptide	p110D	1	BCRSignalingPathway
5294	PIK3CG	phosphoinositide-3-kinase, catalytic, gamma polypeptide	PI3CG|PI3K|PI3Kgamma|PIK3	7	Antimicrobials
5295	PIK3R1	phosphoinositide-3-kinase, regulatory subunit 1 (alpha)	GRB1|p85|p85-ALPHA	5	BCRSignalingPathway
5296	PIK3R2	phosphoinositide-3-kinase, regulatory subunit 2 (beta)	P85B|p85|p85-BETA	19	BCRSignalingPathway
5320	PLA2G2A	phospholipase A2, group IIA (platelets, synovial fluid)	MOM1|PLA2|PLA2B|PLA2L|PLA2S|PLAS1|sPLA2	1	Antimicrobials
5328	PLAU	plasminogen activator, urokinase	ATF|UPA|URK|u-PA	10	Antimicrobials
5329	PLAUR	plasminogen activator, urokinase receptor	CD87|UPAR|URKR	19	Chemokine_Receptors
5335	PLCG1	phospholipase C, gamma 1	PLC-II|PLC1|PLC148|PLCgamma1	20	NaturalKiller_Cell_Cytotoxicity
5336	PLCG2	phospholipase C, gamma 2 (phosphatidylinositol-specific)	-	16	BCRSignalingPathway
5359	PLSCR1	phospholipid scramblase 1	MMTRA1B	3	Antimicrobials
5360	PLTP	phospholipid transfer protein	HDLCQ9	20	Antimicrobials
5362	PLXNA2	plexin A2	FLJ11751|FLJ30634|KIAA0463|OCT|PLXN2	1	Chemokine_Receptors
5364	PLXNB1	plexin B1	KIAA0407|MGC149167|PLEXIN-B1|PLXN5|SEP	3	Chemokine_Receptors
5365	PLXNB3	plexin B3	FLJ76953|PLEXB3|PLEXR|PLXN6	X	Chemokine_Receptors
5367	PMCH	pro-melanin-concentrating hormone	MCH	12	Cytokines
5368	PNOC	prepronociceptin	PPNOC	8	Cytokines
5371	PML	promyelocytic leukemia	MYL|PP8675|RNF71|TRIM19	15	Antimicrobials
5375	PMP2	peripheral myelin protein 2	FABP8|M-FABP|MP2|P2	8	Antimicrobials
5443	POMC	proopiomelanocortin	ACTH|CLIP|LPH|MSH|NPP|POC	2	Cytokines
5465	PPARA	peroxisome proliferator-activated receptor alpha	MGC2237|MGC2452|NR1C1|PPAR|hPPAR	22	Cytokine_Receptors
5467	PPARD	peroxisome proliferator-activated receptor delta	FAAR|MGC3931|NR1C2|NUC1|NUCI|NUCII|PPAR-beta|PPARB	6	Cytokine_Receptors
5468	PPARG	peroxisome proliferator-activated receptor gamma	CIMT1|NR1C3|PPARG1|PPARG2|PPARgamma	3	Antimicrobials
5473	PPBP	pro-platelet basic protein (chemokine (C-X-C motif) ligand 7)	B-TG1|Beta-TG|CTAP-III|CTAP3|CTAPIII|CXCL7|LA-PF4|LDGF|MDGF|NAP-2|PBP|SCYB7|TC1|TC2|TGB|TGB1|THBGB|THBGB1	4	Antimicrobials
5478	PPIA	peptidylprolyl isomerase A (cyclophilin A)	CYPA|CYPH|MGC117158|MGC12404|MGC23397	7	Antimicrobials
5530	PPP3CA	protein phosphatase 3 (formerly 2B), catalytic subunit, alpha isoform	CALN|CALNA|CALNA1|CCN1|CNA1|PPP2B	4	BCRSignalingPathway
5531	PPP4C	protein phosphatase 4 (formerly X), catalytic subunit	PP4|PPH3|PPX	16	Antimicrobials
5532	PPP3CB	protein phosphatase 3 (formerly 2B), catalytic subunit, beta isoform	CALNA2|CALNB	10	BCRSignalingPathway
5533	PPP3CC	protein phosphatase 3 (formerly 2B), catalytic subunit, gamma isoform	CALNA3	8	BCRSignalingPathway
5534	PPP3R1	protein phosphatase 3 (formerly 2B), regulatory subunit B, alpha isoform	CALNB1|CNB|CNB1	2	BCRSignalingPathway
5539	PPY	pancreatic polypeptide	PNP	17	Cytokines
5578	PRKCA	protein kinase C, alpha	AAG6|MGC129900|MGC129901|PKC-alpha|PKCA|PRKACA	17	NaturalKiller_Cell_Cytotoxicity
5579	PRKCB	protein kinase C, beta	MGC41878|PKC-beta|PKCB|PRKCB1|PRKCB2	16	BCRSignalingPathway
5582	PRKCG	protein kinase C, gamma	MGC57564|PKC-gamma|PKCC|PKCG|SCA14	19	NaturalKiller_Cell_Cytotoxicity
5588	PRKCQ	protein kinase C, theta	MGC126514|MGC141919|PRKCT|nPKC-theta	10	TCRsignalingPathway
5594	MAPK1	mitogen-activated protein kinase 1	ERK|ERK2|ERT1|MAPK2|P42MAPK|PRKM1|PRKM2|p38|p40|p41|p41mapk	22	Antimicrobials
5595	MAPK3	mitogen-activated protein kinase 3	ERK1|HS44KDAP|HUMKER1A|MGC20180|P44ERK1|P44MAPK|PRKM3	16	Antimicrobials
5599	MAPK8	mitogen-activated protein kinase 8	JNK|JNK1|JNK1A2|JNK21B1/2|PRKM8|SAPK1	10	Antimicrobials
5604	MAP2K1	mitogen-activated protein kinase kinase 1	MAPKK1|MEK1|MKK1|PRKMK1	15	Antimicrobials
5605	MAP2K2	mitogen-activated protein kinase kinase 2	FLJ26075|MAPKK2|MEK2|MKK2|PRKMK2	19	Antimicrobials
5610	EIF2AK2	eukaryotic translation initiation factor 2-alpha kinase 2	EIF2AK1|MGC126524|PKR|PRKR	2	Antimicrobials
5617	PRL	prolactin	-	6	Cytokines
5618	PRLR	prolactin receptor	hPRLrI	5	Cytokine_Receptors
5624	PROC	protein C (inactivator of coagulation factors Va and VIIIa)	PC|PROC1	2	Antimicrobials
5641	LGMN	legumain	AEP|LGMN1|PRSC1	14	Antigen_Processing_and_Presentation
5648	MASP1	mannan-binding lectin serine peptidase 1 (C4/C2 activating component of Ra-reactive factor)	CRARF|CRARF1|DKFZp686I01199|FLJ26383|MASP|MGC126283|MGC126284|PRSS5|RaRF	3	Antimicrobials
5657	PRTN3	proteinase 3	ACPA|AGP7|C-ANCA|MBT|P29|PR-3	19	Antimicrobials
5696	PSMB8	proteasome (prosome, macropain) subunit, beta type, 8 (large multifunctional peptidase 7)	D6S216|D6S216E|LMP7|MGC1491|PSMB5i|RING10|beta5i	6	Antigen_Processing_and_Presentation
5697	PYY	peptide YY	PYY1	17	Cytokines
5700	PSMC1	proteasome (prosome, macropain) 26S subunit, ATPase, 1	MGC24583|MGC8541|P26S4|S4|p56	14	Antigen_Processing_and_Presentation
5701	PSMC2	proteasome (prosome, macropain) 26S subunit, ATPase, 2	MGC3004|MSS1|Nbla10058|S7	7	Antigen_Processing_and_Presentation
5702	PSMC3	proteasome (prosome, macropain) 26S subunit, ATPase, 3	MGC8487|TBP1	11	Antigen_Processing_and_Presentation
5704	PSMC4	proteasome (prosome, macropain) 26S subunit, ATPase, 4	MGC13687|MGC23214|MGC8570|MIP224|S6|TBP7	19	Antigen_Processing_and_Presentation
5705	PSMC5	proteasome (prosome, macropain) 26S subunit, ATPase, 5	S8|SUG-1|SUG1|TBP10|TRIP1|p45|p45/SUG	17	Antigen_Processing_and_Presentation
5706	PSMC6	proteasome (prosome, macropain) 26S subunit, ATPase, 6	CADP44|MGC12520|P44|SUG2|p42	14	Antigen_Processing_and_Presentation
5707	PSMD1	proteasome (prosome, macropain) 26S subunit, non-ATPase, 1	MGC133040|MGC133041|P112|Rpn2|S1	2	Antigen_Processing_and_Presentation
5708	PSMD2	proteasome (prosome, macropain) 26S subunit, non-ATPase, 2	MGC14274|P97|Rpn1|S2|TRAP2	3	Antigen_Processing_and_Presentation
5709	PSMD3	proteasome (prosome, macropain) 26S subunit, non-ATPase, 3	P58|RPN3|S3	17	Antigen_Processing_and_Presentation
5710	PSMD4	proteasome (prosome, macropain) 26S subunit, non-ATPase, 4	AF|AF-1|ASF|MCB1|Rpn10|S5A|pUB-R5	1	Antigen_Processing_and_Presentation
5711	PSMD5	proteasome (prosome, macropain) 26S subunit, non-ATPase, 5	KIAA0072|MGC23145|S5B	9	Antigen_Processing_and_Presentation
5713	PSMD7	proteasome (prosome, macropain) 26S subunit, non-ATPase, 7	MOV34|P40|Rpn8|S12	16	Antigen_Processing_and_Presentation
5714	PSMD8	proteasome (prosome, macropain) 26S subunit, non-ATPase, 8	HIP6|HYPF|MGC1660|Nin1p|Rpn12|S14|p31	19	Antigen_Processing_and_Presentation
5716	PSMD10	proteasome (prosome, macropain) 26S subunit, non-ATPase, 10	dJ889N15.2|p28	X	Antigen_Processing_and_Presentation
5717	PSMD11	proteasome (prosome, macropain) 26S subunit, non-ATPase, 11	MGC3844|Rpn6|S9|p44.5	17	Antigen_Processing_and_Presentation
5719	PSMD13	proteasome (prosome, macropain) 26S subunit, non-ATPase, 13	HSPC027|Rpn9|S11|p40.5	11	Antigen_Processing_and_Presentation
5720	PSME1	proteasome (prosome, macropain) activator subunit 1 (PA28 alpha)	IFI5111|MGC8628|PA28A|PA28alpha|REGalpha	14	Antigen_Processing_and_Presentation
5721	PSME2	proteasome (prosome, macropain) activator subunit 2 (PA28 beta)	PA28B|PA28beta|REGbeta	14	Antigen_Processing_and_Presentation
5724	PTAFR	platelet-activating factor receptor	PAFR	1	Chemokine_Receptors
5729	PTGDR	prostaglandin D2 receptor (DP)	AS1|ASRT1|DP|DP1|MGC49004	14	Antimicrobials
5730	PTGDS	prostaglandin D2 synthase 21kDa (brain)	LPGDS|PDS|PGD2|PGDS|PGDS2	9	Antimicrobials
5731	PTGER1	prostaglandin E receptor 1 (subtype EP1), 42kDa	EP1	19	Cytokine_Receptors
5732	PTGER2	prostaglandin E receptor 2 (subtype EP2), 53kDa	EP2	14	Cytokine_Receptors
5733	PTGER3	prostaglandin E receptor 3 (subtype EP3)	EP3|EP3-I|EP3-II|EP3-III|EP3-IV|EP3e|MGC141828|MGC141829|MGC27302	1	Cytokine_Receptors
5734	PTGER4	prostaglandin E receptor 4 (subtype EP4)	EP4|EP4R|MGC126583	5	Cytokine_Receptors
5737	PTGFR	prostaglandin F receptor (FP)	FP|MGC120498|MGC46203	1	Cytokine_Receptors
5741	PTH	parathyroid hormone	PTH1	11	Cytokines
5743	PTGS2	prostaglandin-endoperoxide synthase 2 (prostaglandin G/H synthase and cyclooxygenase)	COX-2|COX2|GRIPGHS|PGG/HS|PGHS-2|PHS-2|hCox-2	1	Antimicrobials
5744	PTHLH	parathyroid hormone-like hormone	HHM|MGC14611|PLP|PTHR|PTHRP	12	Cytokines
5745	PTH1R	parathyroid hormone 1 receptor	MGC138426|MGC138452|PFE|PTHR|PTHR1	3	Cytokine_Receptors
5746	PTH2R	parathyroid hormone 2 receptor	PTHR2	2	Cytokine_Receptors
5747	PTK2	PTK2 protein tyrosine kinase 2	FADK|FAK|FAK1|pp125FAK	8	Antimicrobials
5764	PTN	pleiotrophin	HARP|HBGF8|HBNF|NEGF1	7	Cytokines
5777	PTPN6	protein tyrosine phosphatase, non-receptor type 6	HCP|HCPH|HPTP1C|PTP-1C|SH-PTP1|SHP-1|SHP-1L|SHP1	12	BCRSignalingPathway
5781	PTPN11	protein tyrosine phosphatase, non-receptor type 11	BPTP3|CFC|MGC14433|NS1|PTP-1D|PTP2C|SH-PTP2|SH-PTP3|SHP2	12	NaturalKiller_Cell_Cytotoxicity
5788	PTPRC	protein tyrosine phosphatase, receptor type, C	B220|CD45|CD45R|GP180|LCA|LY5|T200	1	TCRsignalingPathway
5806	PTX3	pentraxin-related gene, rapidly induced by IL-1 beta	TNFAIP5|TSG-14	3	Antimicrobials
5879	RAC1	ras-related C3 botulinum toxin substrate 1 (rho family, small GTP binding protein Rac1)	MGC111543|MIG5|TC-25|p21-Rac1	7	BCRSignalingPathway
5880	RAC2	ras-related C3 botulinum toxin substrate 2 (rho family, small GTP binding protein Rac2)	EN-7|Gx|HSPC022	22	BCRSignalingPathway
5881	RAC3	ras-related C3 botulinum toxin substrate 3 (rho family, small GTP binding protein Rac3)	-	17	BCRSignalingPathway
5894	RAF1	v-raf-1 murine leukemia viral oncogene homolog 1	CRAF|NS5|Raf-1|c-Raf	3	NaturalKiller_Cell_Cytotoxicity
5914	RARA	retinoic acid receptor, alpha	NR1B1|RAR	17	Cytokine_Receptors
5915	RARB	retinoic acid receptor, beta	HAP|NR1B2|RRB2	3	Cytokine_Receptors
5916	RARG	retinoic acid receptor, gamma	NR1B3|RARC	12	Cytokine_Receptors
5920	RARRES3	retinoic acid receptor responder (tazarotene induced) 3	HRASLS4|MGC8906|PLA1/2-3|RIG1|TIG3	11	Antimicrobials
5947	RBP1	retinol binding protein 1, cellular	CRABP-I|CRBP|CRBP1|CRBPI|RBPC	3	Antimicrobials
5950	RBP4	retinol binding protein 4, plasma	-	10	Antimicrobials
5967	REG1A	regenerating islet-derived 1 alpha	ICRF|MGC12447|P19|PSP|PSPS|PSPS1|PTP|REG	2	Cytokines
5970	RELA	v-rel reticuloendotheliosis viral oncogene homolog A (avian)	MGC131774|NFKB3|p65	11	Antimicrobials
5971	RELB	v-rel reticuloendotheliosis viral oncogene homolog B	I-REL|IREL	19	Antigen_Processing_and_Presentation
5987	TRIM27	tripartite motif-containing 27	RFP|RNF76	6	Antimicrobials
5993	RFX5	regulatory factor X, 5 (influences HLA class II expression)	-	1	Antigen_Processing_and_Presentation
5994	RFXAP	regulatory factor X-associated protein	-	13	Antigen_Processing_and_Presentation
6013	RLN1	relaxin 1	H1|RLXH1|bA12D24.3.1|bA12D24.3.2	9	Cytokines
6019	RLN2	relaxin 2	H2|RLXH2|bA12D24.1.1|bA12D24.1.2	9	Cytokines
6036	RNASE2	ribonuclease, RNase A family, 2 (liver, eosinophil-derived neurotoxin)	EDN|RNS2	14	Antimicrobials
6091	ROBO1	roundabout, axon guidance receptor, homolog 1 (Drosophila)	DUTT1|FLJ21882|MGC131599|MGC133277|SAX3	3	Chemokine_Receptors
6095	RORA	RAR-related orphan receptor A	DKFZp686M2414|MGC119326|MGC119329|NR1F1|ROR1|ROR2|ROR3|RZR-ALPHA|RZRA	15	Cytokine_Receptors
6096	RORB	RAR-related orphan receptor B	NR1F2|ROR-BETA|RZR-BETA|RZRB|bA133M9.1	9	Cytokine_Receptors
6097	RORC	RAR-related orphan receptor C	MGC129539|NR1F3|RORG|RZR-GAMMA|RZRG|TOR	1	Cytokine_Receptors
6256	RXRA	retinoid X receptor, alpha	FLJ00280|FLJ00318|FLJ16020|FLJ16733|MGC102720|NR2B1	9	Cytokine_Receptors
6257	RXRB	retinoid X receptor, beta	DAUDI6|H-2RIIBP|MGC1831|NR2B2|RCoR-1	6	Cytokine_Receptors
6258	RXRG	retinoid X receptor, gamma	NR2B3|RXRC	1	Cytokine_Receptors
6271	S100A1	S100 calcium binding protein A1	S100|S100-alpha|S100A	1	Antimicrobials
6272	SORT1	sortilin 1	Gp95|NT3	1	Cytokine_Receptors
6273	S100A2	S100 calcium binding protein A2	CAN19|MGC111539|S100L	1	Antimicrobials
6274	S100A3	S100 calcium binding protein A3	S100E	1	Antimicrobials
6276	S100A5	S100 calcium binding protein A5	S100D	1	Antimicrobials
6278	S100A7	S100 calcium binding protein A7	PSOR1|S100A7c	1	Antimicrobials
6279	S100A8	S100 calcium binding protein A8	60B8AG|CAGA|CFAG|CGLA|CP-10|L1Ag|MA387|MIF|MRP8|NIF|P8	1	Antimicrobials
6280	S100A9	S100 calcium binding protein A9	60B8AG|CAGB|CFAG|CGLB|L1AG|LIAG|MAC387|MIF|MRP14|NIF|P14	1	Antimicrobials
6281	S100A10	S100 calcium binding protein A10	42C|ANX2L|ANX2LG|CAL1L|CLP11|Ca[1]|GP11|MGC111133|P11|p10	1	Antimicrobials
6282	S100A11	S100 calcium binding protein A11	MLN70|S100C	1	Antimicrobials
6283	S100A12	S100 calcium binding protein A12	CAAF1|CAGC|CGRP|ENRAGE|MRP6|p6	1	Antimicrobials
6284	S100A13	S100 calcium binding protein A13	-	1	Antimicrobials
6285	S100B	S100 calcium binding protein B	NEF|S100|S100beta	21	Antimicrobials
6286	S100P	S100 calcium binding protein P	MIG9	4	Antimicrobials
6320	CLEC11A	C-type lectin domain family 11, member A	CLECSF3|LSLCL|P47|SCGF	19	Cytokines
6344	SCTR	secretin receptor	SR	2	Cytokine_Receptors
6346	CCL1	chemokine (C-C motif) ligand 1	I-309|P500|SCYA1|SISe|TCA3	17	Antimicrobials
6347	CCL2	chemokine (C-C motif) ligand 2	GDCF-2|HC11|HSMCR30|MCAF|MCP-1|MCP1|MGC9434|SCYA2|SMC-CF	17	Antimicrobials
6352	CCL5	chemokine (C-C motif) ligand 5	D17S136E|MGC17164|RANTES|SCYA5|SISd|TCP228	17	Antimicrobials
6355	CCL8	chemokine (C-C motif) ligand 8	HC14|MCP-2|MCP2|SCYA10|SCYA8	17	Antimicrobials
6356	CCL11	chemokine (C-C motif) ligand 11	MGC22554|SCYA11	17	Antimicrobials
6357	CCL13	chemokine (C-C motif) ligand 13	CKb10|MCP-4|MGC17134|NCC-1|NCC1|SCYA13|SCYL1	17	Antimicrobials
6360	CCL16	chemokine (C-C motif) ligand 16	CKb12|HCC-4|ILINCK|LCC-1|LEC|LMC|MGC117051|Mtn-1|NCC-4|NCC4|SCYA16|SCYL4	17	Antimicrobials
6361	CCL17	chemokine (C-C motif) ligand 17	A-152E5.3|ABCD-2|MGC138271|MGC138273|SCYA17|TARC	16	Antimicrobials
6362	CCL18	chemokine (C-C motif) ligand 18 (pulmonary and activation-regulated)	AMAC-1|AMAC1|CKb7|DC-CK1|DCCK1|MIP-4|PARC|SCYA18	17	Antimicrobials
6363	CCL19	chemokine (C-C motif) ligand 19	CKb11|ELC|MGC34433|MIP-3b|MIP3B|SCYA19	9	Antimicrobials
6364	CCL20	chemokine (C-C motif) ligand 20	CKb4|LARC|MIP-3a|MIP3A|SCYA20|ST38	2	Antimicrobials
6367	CCL22	chemokine (C-C motif) ligand 22	A-152E5.1|ABCD-1|DC/B-CK|MDC|MGC34554|SCYA22|STCP-1	16	Antimicrobials
6368	CCL23	chemokine (C-C motif) ligand 23	CK-BETA-8|CKb8|Ckb-8|Ckb-8-1|MIP-3|MIP3|MPIF-1|SCYA23	17	Antimicrobials
6370	CCL25	chemokine (C-C motif) ligand 25	Ckb15|MGC150327|SCYA25|TECK	19	Antimicrobials
6372	CXCL6	chemokine (C-X-C motif) ligand 6 (granulocyte chemotactic protein 2)	CKA-3|GCP-2|GCP2|SCYB6	4	Antimicrobials
6373	CXCL11	chemokine (C-X-C motif) ligand 11	H174|I-TAC|IP-9|IP9|MGC102770|SCYB11|SCYB9B|b-R1	4	Antimicrobials
6374	CXCL5	chemokine (C-X-C motif) ligand 5	ENA-78|SCYB5	4	Antimicrobials
6375	XCL1	chemokine (C motif) ligand 1	ATAC|LPTN|LTN|SCM-1|SCM-1a|SCM1|SCYC1	1	Antimicrobials
6376	CX3CL1	chemokine (C-X3-C motif) ligand 1	ABCD-3|C3Xkine|CXC3|CXC3C|NTN|NTT|SCYD1|fractalkine|neurotactin	16	Chemokines
6382	SDC1	syndecan 1	CD138|SDC|SYND1|syndecan	2	Cytokine_Receptors
6383	SDC2	syndecan 2	HSPG|HSPG1|SYND2	8	Cytokine_Receptors
6385	SDC4	syndecan 4	MGC22217|SYND4	20	Cytokine_Receptors
6387	CXCL12	chemokine (C-X-C motif) ligand 12 (stromal cell-derived factor 1)	PBSF|SCYB12|SDF-1a|SDF-1b|SDF1|SDF1A|SDF1B|TLSF-a|TLSF-b|TPAR1	10	Antimicrobials
6398	SECTM1	secreted and transmembrane 1	K12	17	Cytokines
6405	SEMA3F	sema domain, immunoglobulin domain (Ig), short basic domain, secreted, (semaphorin) 3F	SEMA-IV|SEMA4|SEMAK	3	Chemokines
6406	SEMG1	semenogelin I	MGC14719|SEMG|SGI	20	Antimicrobials
6407	SEMG2	semenogelin II	SGII	20	Antimicrobials
6441	SFTPD	surfactant protein D	COLEC7|PSP-D|SFTP4|SP-D	10	Antimicrobials
6452	SH3BP2	SH3-domain binding protein 2	3BP2|CRBM|CRPM|FLJ42079|FLJ54978|RES4-23	4	NaturalKiller_Cell_Cytotoxicity
6464	SHC1	SHC (Src homology 2 domain containing) transforming protein 1	FLJ26504|SHC|SHCA	1	NaturalKiller_Cell_Cytotoxicity
6499	SKIV2L	superkiller viralicidic activity 2-like (S. cerevisiae)	170A|DDX13|HLP|SKI2|SKI2W|SKIV2	6	Antimicrobials
6555	SLC10A2	solute carrier family 10 (sodium/bile acid cotransporter family), member 2	ASBT|ISBT|NTCP2	13	Antigen_Processing_and_Presentation
6556	SLC11A1	solute carrier family 11 (proton-coupled divalent metal ion transporters), member 1	LSH|NRAMP|NRAMP1	2	Antimicrobials
6585	SLIT1	slit homolog 1 (Drosophila)	MEGF4|MGC164811|SLIL1|SLIT3|Slit-1	10	Chemokines
6590	SLPI	secretory leukocyte peptidase inhibitor	ALK1|ALP|BLPI|HUSI|HUSI-I|MPI|WAP4|WFDC4	20	Antimicrobials
6647	SOD1	superoxide dismutase 1, soluble	ALS|ALS1|IPOA|SOD|homodimer	21	Antimicrobials
6654	SOS1	son of sevenless homolog 1 (Drosophila)	GF1|GGF1|GINGF|HGF|NS4	2	NaturalKiller_Cell_Cytotoxicity
6655	SOS2	son of sevenless homolog 2 (Drosophila)	FLJ25596	14	NaturalKiller_Cell_Cytotoxicity
6667	SP1	Sp1 transcription factor	-	12	Antimicrobials
6696	SPP1	secreted phosphoprotein 1	BNSP|BSPI|ETA-1|MGC110940|OPN	4	Cytokines
6714	SRC	v-src sarcoma (Schmidt-Ruppin A-2) viral oncogene homolog (avian)	ASV|SRC1|c-SRC|p60-Src	20	Antimicrobials
6750	SST	somatostatin	SMST	3	Cytokines
6752	SSTR2	somatostatin receptor 2	-	17	Cytokine_Receptors
6755	SSTR5	somatostatin receptor 5	-	16	Cytokine_Receptors
6772	STAT1	signal transducer and activator of transcription 1, 91kDa	DKFZp686B04100|ISGF-3|STAT91	2	Antimicrobials
6774	STAT3	signal transducer and activator of transcription 3 (acute-phase response factor)	APRF|FLJ20882|HIES|MGC16063	17	Antimicrobials
6781	STC1	stanniocalcin 1	STC	8	Cytokines
6850	SYK	spleen tyrosine kinase	DKFZp313N1010|FLJ25043|FLJ37489	9	BCRSignalingPathway
6863	TAC1	tachykinin, precursor 1	Hs.2563|NK2|NKNA|NPK|TAC2	7	Cytokines
6869	TACR1	tachykinin receptor 1	NK1R|NKIR|SPR|TAC1R	2	Cytokine_Receptors
6891	TAP2	transporter 2, ATP-binding cassette, sub-family B (MDR/TAP)	ABC18|ABCB3|APT2|D6S217E|PSF2|RING11	6	Antigen_Processing_and_Presentation
6892	TAPBP	TAP binding protein (tapasin)	NGS17|TAPA|TPN|TPSN|tapasin	6	Antigen_Processing_and_Presentation
6934	TCF7L2	transcription factor 7-like 2 (T-cell specific, HMG-box)	TCF-4|TCF4	10	Antimicrobials
7001	PRDX2	peroxiredoxin 2	MGC4104|NKEFB|PRP|PRX2|PRXII|TDPX1|TSA	19	Antimicrobials
7006	TEC	tec protein tyrosine kinase	MGC126760|MGC126762|PSCTK4	4	TCRsignalingPathway
7010	TEK	TEK tyrosine kinase, endothelial	CD202B|TIE-2|TIE2|VMCM|VMCM1	9	Cytokine_Receptors
7025	NR2F1	nuclear receptor subfamily 2, group F, member 1	COUP-TFI|EAR-3|EAR3|ERBAL3|NR2F2|SVP44|TCFCOUP1|TFCOUP1	5	Cytokine_Receptors
7026	NR2F2	nuclear receptor subfamily 2, group F, member 2	ARP1|COUP-TFII|COUPTFB|MGC117452|SVP40|TFCOUP2	15	Cytokine_Receptors
7036	TFR2	transferrin receptor 2	HFE3|MGC126368|TFRC2	7	Antimicrobials
7037	TFRC	transferrin receptor (p90, CD71)	CD71|TFR|TFR1|TRFR	3	Antimicrobials
7039	TGFA	transforming growth factor, alpha	TFGA	2	Cytokines
7042	TGFB2	transforming growth factor, beta 2	MGC116892|TGF-beta2	1	Cytokines
7043	TGFB3	transforming growth factor, beta 3	ARVD|FLJ16571|TGF-beta3	14	Cytokines
7044	LEFTY2	left-right determination factor 2	EBAF|LEFTA|LEFTYA|MGC46222|TGFB4	1	Cytokines
7046	TGFBR1	transforming growth factor, beta receptor 1	AAT5|ACVRLK4|ALK-5|ALK5|LDS1A|LDS2A|SKR4|TGFR-1	9	Cytokine_Receptors
7048	TGFBR2	transforming growth factor, beta receptor II (70/80kDa)	AAT3|FAA3|LDS1B|LDS2B|MFS2|RIIC|TAAD2|TGFR-2|TGFbeta-RII	3	Cytokine_Receptors
7049	TGFBR3	transforming growth factor, beta receptor III	BGCAN|betaglycan	1	Cytokine_Receptors
7057	THBS1	thrombospondin 1	THBS|THBS-1|TSP|TSP-1|TSP1	15	Antigen_Processing_and_Presentation
7066	THPO	thrombopoietin	MGC163194|MGDF|MKCSF|ML|MPLLG|TPO	3	Cytokines
7067	THRA	thyroid hormone receptor, alpha (erythroblastic leukemia viral (v-erb-a) oncogene homolog, avian)	AR7|EAR7|ERB-T-1|ERBA|ERBA1|MGC000261|MGC43240|NR1A1|THRA1|THRA2|c-ERBA-1	17	Cytokine_Receptors
7068	THRB	thyroid hormone receptor, beta (erythroblastic leukemia viral (v-erb-a) oncogene homolog 2, avian)	ERBA-BETA|ERBA2|GRTH|MGC126109|MGC126110|NR1A2|PRTH|THR1|THRB1|THRB2	3	Cytokine_Receptors
7075	TIE1	tyrosine kinase with immunoglobulin-like and EGF-like domains 1	JTK14|TIE	1	Cytokine_Receptors
7084	TK2	thymidine kinase 2, mitochondrial	-	16	Antimicrobials
7096	TLR1	toll-like receptor 1	CD281|DKFZp547I0610|DKFZp564I0682|KIAA0012|MGC104956|MGC126311|MGC126312|TIL|rsc786	4	Antimicrobials
7097	TLR2	toll-like receptor 2	CD282|TIL4	4	Antimicrobials
7098	TLR3	toll-like receptor 3	CD283	4	Antimicrobials
7114	TMSB4X	thymosin beta 4, X-linked	FX|PTMB4|TB4X|TMSB4	X	Antimicrobials
7124	TNF	tumor necrosis factor (TNF superfamily, member 2)	DIF|TNF-alpha|TNFA|TNFSF2	6	Antimicrobials
7128	TNFAIP3	tumor necrosis factor, alpha-induced protein 3	A20|MGC104522|MGC138687|MGC138688|OTUD7C|TNFA1P2	6	Antimicrobials
7132	TNFRSF1A	tumor necrosis factor receptor superfamily, member 1A	CD120a|FPF|MGC19588|TBP1|TNF-R|TNF-R-I|TNF-R55|TNFAR|TNFR1|TNFR55|TNFR60|p55|p55-R|p60	12	Cytokine_Receptors
7133	TNFRSF1B	tumor necrosis factor receptor superfamily, member 1B	CD120b|TBPII|TNF-R-II|TNF-R75|TNFBR|TNFR1B|TNFR2|TNFR80|p75|p75TNFR	1	Cytokine_Receptors
7169	TPM2	tropomyosin 2 (beta)	AMCD1|DA1|DA2B|TMSB	9	Antimicrobials
7178	TPT1	tumor protein, translationally-controlled 1	FLJ27337|HRF|TCTP|p02	13	Antimicrobials
7181	NR2C1	nuclear receptor subfamily 2, group C, member 1	TR2	12	Cytokine_Receptors
7182	NR2C2	nuclear receptor subfamily 2, group C, member 2	TAK1|TR2R1|TR4|hTAK1	3	Cytokine_Receptors
7187	TRAF3	TNF receptor-associated factor 3	CAP-1|CD40bp|CRAF1|LAP1	14	Antimicrobials
7200	TRH	thyrotropin-releasing hormone	MGC125964|MGC125965	3	Cytokines
7201	TRHR	thyrotropin-releasing hormone receptor	MGC141920	8	Cytokine_Receptors
7253	TSHR	thyroid stimulating hormone receptor	CHNG1|LGR3|MGC75129|hTSHR-I	14	Cytokine_Receptors
7292	TNFSF4	tumor necrosis factor (ligand) superfamily, member 4	CD134L|CD252|GP34|OX-40L|OX4OL|TXGP1	1	Antimicrobials
7293	TNFRSF4	tumor necrosis factor receptor superfamily, member 4	ACT35|CD134|OX40|TXGP1L	1	Cytokine_Receptors
7294	TXK	TXK tyrosine kinase	BTKL|MGC22473|PSCTK5|PTK4|RLK|TKL	4	Antimicrobials
7297	TYK2	tyrosine kinase 2	JTK1	19	Antimicrobials
7305	TYROBP	TYRO protein tyrosine kinase binding protein	DAP12|KARAP|PLOSL	19	NaturalKiller_Cell_Cytotoxicity
7349	UCN	urocortin	MGC129974|MGC129975|UI|UROC	2	Cytokines
7376	NR1H2	nuclear receptor subfamily 1, group H, member 2	LXR-b|LXRB|NER|NER-I|RIP15|UNR	19	Cytokine_Receptors
7409	VAV1	vav 1 guanine nucleotide exchange factor	VAV	19	BCRSignalingPathway
7410	VAV2	vav 2 guanine nucleotide exchange factor	-	9	BCRSignalingPathway
7412	VCAM1	vascular cell adhesion molecule 1	CD106|DKFZp779G2333|INCAM-100|MGC99561	1	Antimicrobials
7421	VDR	vitamin D (1,25- dihydroxyvitamin D3) receptor	NR1I1	12	Antimicrobials
7422	VEGFA	vascular endothelial growth factor A	MGC70609|MVCD1|VEGF|VEGF-A|VPF	6	Antimicrobials
7423	VEGFB	vascular endothelial growth factor B	VEGFL|VRF	11	Cytokines
7424	VEGFC	vascular endothelial growth factor C	Flt4-L|VRP	4	Cytokines
7425	VGF	VGF nerve growth factor inducible	-	7	Cytokines
7431	VIM	vimentin	FLJ36605	10	Antimicrobials
7432	VIP	vasoactive intestinal peptide	MGC13587|PHM27	6	Cytokines
7433	VIPR1	vasoactive intestinal peptide receptor 1	FLJ41949|HVR1|II|PACAP-R-2|RDC1|VAPC1|VIPR|VIRG|VPAC1|VPCAP1R	3	Cytokine_Receptors
7434	VIPR2	vasoactive intestinal peptide receptor 2	FLJ16511|VPAC2|VPCAP2R	7	Cytokine_Receptors
7448	VTN	vitronectin	V75|VN|VNT	17	Antimicrobials
7474	WNT5A	wingless-type MMTV integration site family, member 5A	hWNT5A	3	Antimicrobials
7535	ZAP70	zeta-chain (TCR) associated protein kinase 70kDa	FLJ17670|FLJ17679|SRK|STD|TZK|ZAP-70	2	NaturalKiller_Cell_Cytotoxicity
7791	ZYX	zyxin	ESP-2|HED-2	7	Antimicrobials
7850	IL1R2	interleukin 1 receptor, type II	CD121b|IL1RB|MGC47725	2	Cytokine_Receptors
7852	CXCR4	chemokine (C-X-C motif) receptor 4	CD184|D2S201E|FB22|HM89|HSY3RR|LAP3|LCR1|LESTR|NPY3R|NPYR|NPYRL|NPYY3R|WHIM	2	Antimicrobials
7857	SCG2	secretogranin II (chromogranin C)	CHGC|SN|SgII	2	Cytokines
7869	SEMA3B	sema domain, immunoglobulin domain (Ig), short basic domain, secreted, (semaphorin) 3B	FLJ34863|LUCA-1|SEMA5|SEMAA|SemA|semaV	3	Chemokines
7979	SHFM1	split hand/foot malformation (ectrodactyly) type 1	DSS1|ECD|SEM1|SHFD1|SHSF1|Shfdg1	7	Antigen_Processing_and_Presentation
8013	NR4A3	nuclear receptor subfamily 4, group A, member 3	CHN|CSMF|MINOR|NOR1|TEC	9	Cytokine_Receptors
8190	MIA	melanoma inhibitory activity	CD-RAP	19	Cytokines
8200	GDF5	growth differentiation factor 5	BMP14|CDMP1|LAP4|OS5|SYNS2	20	Cytokines
8302	KLRC4	killer cell lectin-like receptor subfamily C, member 4	FLJ17759|FLJ78582|NKG2-F|NKG2F	12	Antigen_Processing_and_Presentation
8425	LTBP4	latent transforming growth factor beta binding protein 4	FLJ46318|FLJ90018|LTBP-4|LTBP-4L	19	Cytokines
8431	NR0B2	nuclear receptor subfamily 0, group B, member 2	FLJ17090|SHP|SHP1	1	Cytokine_Receptors
8440	NCK2	NCK adaptor protein 2	GRB4|NCKbeta	2	TCRsignalingPathway
8482	SEMA7A	semaphorin 7A, GPI membrane anchor (John Milton Hagen blood group)	CD108|CDw108|H-SEMA-K1|H-Sema-L|JMH|MGC126692|MGC126696|SEMAK1|SEMAL	15	Chemokines
8503	PIK3R3	phosphoinositide-3-kinase, regulatory subunit 3 (gamma)	DKFZp686P05226|FLJ41892|p55|p55-GAMMA	1	BCRSignalingPathway
8517	IKBKG	inhibitor of kappa light polypeptide gene enhancer in B-cells, kinase gamma	AMCBX1|FIP-3|FIP3|Fip3p|IKK-gamma|IP|IP1|IP2|IPD2|NEMO	X	BCRSignalingPathway
8546	AP3B1	adaptor-related protein complex 3, beta 1 subunit	ADTB3|ADTB3A|HPS|HPS2|PE	5	Antigen_Processing_and_Presentation
8549	LGR5	leucine-rich repeat-containing G protein-coupled receptor 5	FEX|GPR49|GPR67|GRP49|HG38|MGC117008	12	Cytokine_Receptors
8600	TNFSF11	tumor necrosis factor (ligand) superfamily, member 11	CD254|ODF|OPGL|OPTB2|RANKL|TRANCE|hRANKL2|sOdf	13	Antimicrobials
8614	STC2	stanniocalcin 2	STC-2|STCRP	5	Cytokines
8620	NPFF	neuropeptide FF-amide peptide precursor	FMRFAL	12	Cytokines
8625	RFXANK	regulatory factor X-associated ankyrin-containing protein	ANKRA1|BLS|F14150_1|MGC138628|RFX-B	19	Antigen_Processing_and_Presentation
8651	SOCS1	suppressor of cytokine signaling 1	CIS1|CISH1|JAB|SOCS-1|SSI-1|SSI1|TIP3	16	Antimicrobials
8678	BECN1	beclin 1, autophagy related	ATG6|VPS30|beclin1	17	Antimicrobials
8685	MARCO	macrophage receptor with collagenous structure	SCARA2	2	Antimicrobials
8718	TNFRSF25	tumor necrosis factor receptor superfamily, member 25	APO-3|DDR3|DR3|LARD|TNFRSF12|TR3|TRAMP|WSL-1|WSL-LR	1	Cytokine_Receptors
8726	EED	embryonic ectoderm development	HEED|WAIT1	11	Antimicrobials
8740	TNFSF14	tumor necrosis factor (ligand) superfamily, member 14	CD258|HVEML|LIGHT|LTg|TR2	19	Cytokines
8743	TNFSF10	tumor necrosis factor (ligand) superfamily, member 10	APO2L|Apo-2L|CD253|TL2|TRAIL	3	Antimicrobials
8744	TNFSF9	tumor necrosis factor (ligand) superfamily, member 9	4-1BB-L|CD137L	19	Cytokines
8764	TNFRSF14	tumor necrosis factor receptor superfamily, member 14 (herpesvirus entry mediator)	ATAR|HVEA|HVEM|LIGHTR|TR2	1	Cytokine_Receptors
8792	TNFRSF11A	tumor necrosis factor receptor superfamily, member 11a, NFKB activator	CD265|FEO|LOH18CR1|ODFR|OFE|OPTB7|OSTS|PDB2|RANK|TRANCER	18	Cytokine_Receptors
8793	TNFRSF10D	tumor necrosis factor receptor superfamily, member 10d, decoy with truncated death domain	CD264|DCR2|TRAILR4|TRUNDD	8	Cytokine_Receptors
8795	TNFRSF10B	tumor necrosis factor receptor superfamily, member 10b	CD262|DR5|KILLER|KILLER/DR5|TRAIL-R2|TRAILR2|TRICK2|TRICK2A|TRICK2B|TRICKB|ZTNFR9	8	Antimicrobials
8807	IL18RAP	interleukin 18 receptor accessory protein	ACPL|CD218b|CDw218b|IL18RB|MGC120589|MGC120590	2	Cytokine_Receptors
8808	IL1RL2	interleukin 1 receptor-like 2	IL1R-rp2|IL1RRP2	2	Cytokine_Receptors
8809	IL18R1	interleukin 18 receptor 1	CD218a|CDw218a|IL-1Rrp|IL18RA|IL1RRP	2	Cytokine_Receptors
8811	GALR2	galanin receptor 2	GALNR2|MGC125983|MGC125984	17	Cytokine_Receptors
8817	FGF18	fibroblast growth factor 18	FGF-18|ZFGF5	5	Cytokines
8828	NRP2	neuropilin 2	MGC126574|NP2|NPN2|PRO2714|VEGF165R2	2	Cytokine_Receptors
8829	NRP1	neuropilin 1	BDCA4|CD304|DKFZp686A03134|DKFZp781F1414|NP1|NRP|VEGF165R	10	Cytokine_Receptors
8856	NR1I2	nuclear receptor subfamily 1, group I, member 2	BXR|ONR1|PAR|PAR1|PAR2|PARq|PRR|PXR|SAR|SXR	3	Cytokine_Receptors
8909	P11	26 serine protease	MGC133268|PP11|PRSS26	12	Cytokines
8915	BCL10	B-cell CLL/lymphoma 10	CARMEN|CIPER|CLAP|c-E10|mE10	1	BCRSignalingPathway
8993	PGLYRP1	peptidoglycan recognition protein 1	MGC126894|MGC126896|PGLYRP|PGRP|PGRP-S|PGRPS|TAG7|TNFSF3L	19	Antimicrobials
9020	MAP3K14	mitogen-activated protein kinase kinase kinase 14	FTDCR1B|HS|HSNIK|NIK	17	TCRsignalingPathway
9021	SOCS3	suppressor of cytokine signaling 3	ATOD4|CIS3|Cish3|MGC71791|SOCS-3|SSI-3|SSI3	17	Antimicrobials
9034	CCRL2	chemokine (C-C motif) receptor-like 2	CKRX|CRAM-A|CRAM-B|FLJ55815|HCR|MGC116710|MGC34104	3	Chemokine_Receptors
9037	SEMA5A	sema domain, seven thrombospondin repeats (type 1 and type 1-like), transmembrane domain (TM) and short cytoplasmic domain, (semaphorin) 5A	FLJ12815|SEMAF|semF	5	Chemokines
9048	ARTN	artemin	ENOVIN|EVN|NBN	1	Cytokines
9087	TMSB4Y	thymosin beta 4, Y-linked	MGC26307|TB4Y	Y	Antimicrobials
9135	RABEP1	rabaptin, RAB GTPase binding effector protein 1	RAB5EP|RABPT5	17	Cytokines
9168	TMSB10	thymosin beta 10	MIG12|TB10	2	Antimicrobials
9173	IL1RL1	interleukin 1 receptor-like 1	DER4|FIT-1|MGC32623|ST2|ST2L|ST2V|T1	2	Cytokine_Receptors
9180	OSMR	oncostatin M receptor	MGC150626|MGC150627|MGC75127|OSMRB	5	Cytokine_Receptors
9235	IL32	interleukin 32	IL-32alpha|IL-32beta|IL-32delta|IL-32gamma|NK4|TAIF|TAIFa|TAIFb|TAIFc|TAIFd	16	Cytokines
9244	CRLF1	cytokine receptor-like factor 1	CISS|CISS1|CLF|CLF-1|NR6	19	Cytokine_Receptors
9255	SCYE1	small inducible cytokine subfamily E, member 1 (endothelial monocyte-activating)	AIMP1|EMAP2|EMAPII|p43	4	Cytokines
9294	S1PR2	sphingosine-1-phosphate receptor 2	AGR16|EDG-5|EDG5|Gpcr13|H218|LPB2|S1P2	19	Cytokine_Receptors
9353	SLIT2	slit homolog 2 (Drosophila)	FLJ14420|SLIL3|Slit-2	4	Chemokines
9365	KL	klotho	-	13	Cytokines
9370	ADIPOQ	adiponectin, C1Q and collagen domain containing	ACDC|ACRP30|ADIPQTL1|ADPN|APM-1|APM1|GBP28|adiponectin	3	Antimicrobials
9402	GRAP2	GRB2-related adaptor protein 2	GADS|GRAP-2|GRB2L|GRBLG|GRID|GRPL|GrbX|Grf40|Mona|P38	22	TCRsignalingPathway
9436	NCR2	natural cytotoxicity triggering receptor 2	CD336|LY95|NK-p44|NKP44|dJ149M18.1	6	NaturalKiller_Cell_Cytotoxicity
9437	NCR1	natural cytotoxicity triggering receptor 1	CD335|FLJ99094|LY94|NK-p46|NKP46	19	NaturalKiller_Cell_Cytotoxicity
9466	IL27RA	interleukin 27 receptor, alpha	CRL1|IL27R|TCCR|WSX1|zcytor1	19	Cytokine_Receptors
9518	GDF15	growth differentiation factor 15	GDF-15|MIC-1|MIC1|NAG-1|PDF|PLAB|PTGFB	19	Antimicrobials
9535	GMFG	glia maturation factor, gamma	GMF-GAMMA|MGC126867	19	Cytokines
9542	NRG2	neuregulin 2	Don-1|HRG2|NTAK	5	Cytokines
9636	ISG15	ISG15 ubiquitin-like modifier	G1P2|IFI15|UCRP	1	Antimicrobials
9641	IKBKE	inhibitor of kappa light polypeptide gene enhancer in B-cells, kinase epsilon	IKK-i|IKKE|IKKI|KIAA0151|MGC125294|MGC125295|MGC125297	1	Antimicrobials
9672	SDC3	syndecan 3	N-syndecan|SDCN|SYND3	1	Cytokine_Receptors
9723	SEMA3E	sema domain, immunoglobulin domain (Ig), short basic domain, secreted, (semaphorin) 3E	KIAA0331|M-SEMAH|M-SemaK|SEMAH|coll-5	7	Chemokines
9861	PSMD6	proteasome (prosome, macropain) 26S subunit, non-ATPase, 6	KIAA0107|Rpn7|S10|SGA-113M|p44S10	3	Antigen_Processing_and_Presentation
9970	NR1I3	nuclear receptor subfamily 1, group I, member 3	CAR|CAR1|MB67|MGC150433|MGC97144|MGC97209	1	Cytokine_Receptors
9971	NR1H4	nuclear receptor subfamily 1, group H, member 4	BAR|FXR|HRR-1|HRR1|MGC163445|RIP14	12	Cytokine_Receptors
9975	NR1D2	nuclear receptor subfamily 1, group D, member 2	BD73|EAR-1R|RVR	3	Cytokine_Receptors
10000	AKT3	v-akt murine thymoma viral oncogene homolog 3 (protein kinase B, gamma)	DKFZp434N0250|PKB-GAMMA|PKBG|PRKBG|RAC-PK-gamma|RAC-gamma|STK-2	1	BCRSignalingPathway
10002	NR2E3	nuclear receptor subfamily 2, group E, member 3	ESCS|MGC49976|PNR|RNR|RP37|rd7	15	Cytokine_Receptors
10010	TANK	TRAF family member-associated NFKB activator	I-TRAF|TRAF2	2	Antimicrobials
10062	NR1H3	nuclear receptor subfamily 1, group H, member 3	LXR-a|LXRA|RLD-1	11	Cytokine_Receptors
10125	RASGRP1	RAS guanyl releasing protein 1 (calcium and DAG-regulated)	CALDAG-GEFI|CALDAG-GEFII|MGC129998|MGC129999|RASGRP|V|hRasGRP1	15	TCRsignalingPathway
10135	NAMPT	nicotinamide phosphoribosyltransferase	1110035O14Rik|DKFZp666B131|MGC117256|PBEF|PBEF1|VF|VISFATIN	7	Cytokines
10154	PLXNC1	plexin C1	CD232|PLXN-C1|VESPR	12	Chemokine_Receptors
10197	PSME3	proteasome (prosome, macropain) activator subunit 3 (PA28 gamma; Ki)	Ki|PA28-gamma|PA28G|REG-GAMMA	17	Antigen_Processing_and_Presentation
10203	CALCRL	calcitonin receptor-like	CGRPR|CRLR	2	Cytokine_Receptors
10213	PSMD14	proteasome (prosome, macropain) 26S subunit, non-ATPase, 14	PAD1|POH1|rpn11	2	Antigen_Processing_and_Presentation
10218	ANGPTL7	angiopoietin-like 7	AngX|CDT6|RP4-647M16.2|dJ647M16.1	1	Cytokines
10220	GDF11	growth differentiation factor 11	BMP-11|BMP11	12	Cytokines
10257	ABCC4	ATP-binding cassette, sub-family C (CFTR/MRP), member 4	EST170205|MOAT-B|MOATB|MRP4	13	Antimicrobials
10298	PAK4	p21 protein (Cdc42/Rac)-activated kinase 4	-	19	TCRsignalingPathway
10314	LANCL1	LanC lantibiotic synthetase component C-like 1 (bacterial)	GPR69A|p40	2	Antimicrobials
10332	CLEC4M	C-type lectin domain family 4, member M	CD209L|CD299|DC-SIGN2|DC-SIGNR|DCSIGNR|HP10347|L-SIGN|LSIGN|MGC129964|MGC47866	19	Antigen_Processing_and_Presentation
10346	TRIM22	tripartite motif-containing 22	GPSTAF50|RNF94|STAF50	11	Antimicrobials
10371	SEMA3A	sema domain, immunoglobulin domain (Ig), short basic domain, secreted, (semaphorin) 3A	Hsema-I|Hsema-III|MGC133243|SEMA1|SEMAD|SEMAIII|SEMAL|SemD|coll-1	7	Chemokines
10381	TUBB3	tubulin, beta 3	MC1R|TUBB4|beta-4	16	Cytokine_Receptors
10397	NDRG1	N-myc downstream regulated 1	CAP43|CMT4D|DRG1|GC4|HMSNL|NDR1|NMSL|PROXY1|RIT42|RTP|TARG1|TDD5	8	Antimicrobials
10406	WFDC2	WAP four-disulfide core domain 2	HE4|MGC57529|WAP5|dJ461P17.6	20	Antimicrobials
10424	PGRMC2	progesterone receptor membrane component 2	DG6|PMBP	4	Cytokine_Receptors
10447	FAM3C	family with sequence similarity 3, member C	GS3786|ILEI	7	Cytokines
10500	SEMA6C	sema domain, transmembrane domain (TM), and cytoplasmic domain, (semaphorin) 6C	SEMAY|m-SemaY|m-SemaY2	1	Chemokines
10505	SEMA4F	sema domain, immunoglobulin domain (Ig), transmembrane domain (TM) and short cytoplasmic domain, (semaphorin) 4F	M-SEMA|PRO2353|SEMAM|SEMAW|m-Sema-M	2	Chemokines
10507	SEMA4D	sema domain, immunoglobulin domain (Ig), transmembrane domain (TM) and short cytoplasmic domain, (semaphorin) 4D	C9orf164|CD100|FLJ33485|FLJ34282|FLJ39737|FLJ46484|M-sema-G|MGC169138|MGC169141|SEMAJ|coll-4	9	Chemokines
10512	SEMA3C	sema domain, immunoglobulin domain (Ig), short basic domain, secreted, (semaphorin) 3C	SEMAE|SemE	7	Chemokines
10521	DDX17	DEAD (Asp-Glu-Ala-Asp) box polypeptide 17	DKFZp761H2016|P72|RH70	22	Antimicrobials
10544	PROCR	protein C receptor, endothelial (EPCR)	CCCA|CCD41|CD201|EPCR|MGC23024|bA42O4.2	20	Antigen_Processing_and_Presentation
10563	CXCL13	chemokine (C-X-C motif) ligand 13	ANGIE|ANGIE2|BCA-1|BCA1|BLC|BLR1L|SCYB13	4	Antimicrobials
10578	GNLY	granulysin	519|D2S69E|LAG-2|LAG2|NKG5|TLA519	2	Antimicrobials
10584	COLEC10	collectin sub-family member 10 (C-type lectin)	CLL1|MGC118794|MGC118795	8	Antimicrobials
10637	LEFTY1	left-right determination factor 1	LEFTB|LEFTYB	1	Cytokines
10663	CXCR6	chemokine (C-X-C motif) receptor 6	BONZO|CD186|STRL33|TYMSTR	3	Antimicrobials
10675	CSPG5	chondroitin sulfate proteoglycan 5 (neuroglycan C)	MGC44034|NGC	3	Cytokines
10725	NFAT5	nuclear factor of activated T-cells 5, tonicity-responsive	KIAA0827|NF-AT5|NFATL1|NFATZ|OREBP|TONEBP	16	BCRSignalingPathway
10747	MASP2	mannan-binding lectin serine peptidase 2	MAP19|MASP-2|sMAP	1	Antimicrobials
10803	CCR9	chemokine (C-C motif) receptor 9	CDw199|GPR-9-6|GPR28	3	Chemokine_Receptors
10850	CCL27	chemokine (C-C motif) ligand 27	ALP|CTACK|CTAK|ESKINE|ILC|PESKY|SCYA27	9	Antimicrobials
10892	MALT1	mucosa associated lymphoid tissue lymphoma translocation gene 1	DKFZp434L132|MLT|MLT1	18	BCRSignalingPathway
10895	PPBPL2	pro-platelet basic protein-like 2	SPBPBP	4	Cytokines
10902	BRD8	bromodomain containing 8	SMAP|SMAP2|p120	5	Cytokine_Receptors
11005	SPINK5	serine peptidase inhibitor, Kazal type 5	DKFZp686K19184|FLJ21544|FLJ97536|FLJ97596|FLJ99794|LEKTI|LETKI|NETS|NS|VAKTI	5	Antimicrobials
11009	IL24	interleukin 24	C49A|FISP|IL-24|IL10B|MDA7|Mob-5|ST16|mda-7	1	Cytokines
11013	TMSB15A	thymosin beta 15a	TMSB15|TMSL8|TMSNB|Tb15|TbNB	X	Antimicrobials
11025	LILRB3	leukocyte immunoglobulin-like receptor, subfamily B (with TM and ITIM domains), member 3	CD85A|HL9|ILT5|LIR-3|LIR3|MGC138403|PIRB	19	BCRSignalingPathway
11047	ADRM1	adhesion regulating molecule 1	ARM1|GP110|MGC29536|Rpn13	20	Antigen_Processing_and_Presentation
11054	OGFR	opioid growth factor receptor	-	20	Cytokine_Receptors
11082	ESM1	endothelial cell-specific molecule 1	endocan	5	Cytokines
11251	GPR44	G protein-coupled receptor 44	CD294|CRTH2|DP2	11	Chemokine_Receptors
11261	CHP	calcium binding protein P22	SLC9A1BP	15	BCRSignalingPathway
22943	DKK1	dickkopf homolog 1 (Xenopus laevis)	DKK-1|SK	10	Cytokines
23129	PLXND1	plexin D1	KIAA0620|MGC75353|PLEXD1	3	Chemokine_Receptors
23392	KIAA0368	KIAA0368	ECM29|FLJ22036|KIAA1962|RP11-386D8.2	9	Antigen_Processing_and_Presentation
23452	ANGPTL2	angiopoietin-like 2	ARP2|HARP|MGC8889	9	Cytokine_Receptors
23495	TNFRSF13B	tumor necrosis factor receptor superfamily, member 13B	CD267|CVID|FLJ39942|MGC133214|MGC39952|TACI|TNFRSF14B	17	Cytokine_Receptors
23654	PLXNB2	plexin B2	KIAA0315|MM1|Nbla00445|PLEXB2|dJ402G11.3	22	Chemokine_Receptors
23765	IL17RA	interleukin 17 receptor A	CD217|CDw217|IL-17RA|IL17R|MGC10262|hIL-17R	22	Cytokine_Receptors
25780	RASGRP3	RAS guanyl releasing protein 3 (calcium and DAG-regulated)	GRP3|KIAA0846	2	BCRSignalingPathway
26133	TRPC4AP	transient receptor potential cation channel, subfamily C, member 4 associated protein	C20orf188|TRRP4AP|TRUSS	20	Antigen_Processing_and_Presentation
26585	GREM1	gremlin 1, cysteine knot superfamily, homolog (Xenopus laevis)	CKTSF1B1|DAND2|DRM|GREMLIN|IHG-2|MGC126660|PIG2	15	Cytokines
27035	NOX1	NADPH oxidase 1	GP91-2|MOX1|NOH-1|NOH1	X	Antimicrobials
27040	LAT	linker for activation of T cells	LAT1|pp36	16	NaturalKiller_Cell_Cytotoxicity
27101	CACYBP	calcyclin binding protein	GIG5|MGC87971|PNAS-107|RP1-102G20.6|S100A6BP|SIP	1	Antimicrobials
27242	TNFRSF21	tumor necrosis factor receptor superfamily, member 21	BM-018|DR6|MGC31965	6	Cytokine_Receptors
27302	BMP10	bone morphogenetic protein 10	MGC126783	2	Cytokines
27350	APOBEC3C	apolipoprotein B mRNA editing enzyme, catalytic polypeptide-like 3C	APOBEC1L|ARDC2|ARDC4|ARP5|MGC19485|PBI|bK150C2.3	22	Antimicrobials
29760	BLNK	B-cell linker	BASH|BLNK-S|LY57|MGC111051|SLP-65|SLP65	10	BCRSignalingPathway
29851	ICOS	inducible T-cell co-stimulator	AILIM|CD278|MGC39850	2	TCRsignalingPathway
29937	NENF	neuron derived neurotrophic factor	CIR2|NEUDESIN|SCIRP10|SPUF	1	Cytokines
50810	HDGFRP3	hepatoma-derived growth factor, related protein 3	CGI-142|HDGF2	15	Cytokines
51035	UBXN1	UBX domain protein 1	2B28|UBXD10	11	Antigen_Processing_and_Presentation
51050	PI15	peptidase inhibitor 15	CRISP8|DKFZp686F0366|P24TI|P25TI	8	Antimicrobials
51083	GAL	galanin prepropeptide	GALN|GLNN|GMAP|MGC40167	11	Cytokines
51232	CRIM1	cysteine rich transmembrane BMP regulator 1 (chordin-like)	MGC138194|S52	2	Cytokine_Receptors
51379	CRLF3	cytokine receptor-like factor 3	CREME9|CYTOR4|FRWS|MGC20661	17	Cytokine_Receptors
51561	IL23A	interleukin 23, alpha subunit p19	IL-23|IL-23A|IL23P19|MGC79388|P19|SGRF	12	Cytokines
51752	ERAP1	endoplasmic reticulum aminopeptidase 1	A-LAP|ALAP|APPILS|ARTS-1|ARTS1|ERAAP|ERAAP1|KIAA0525|PILS-AP|PILSAP	5	Antigen_Processing_and_Presentation
53358	SHC3	SHC (Src homology 2 domain containing) transforming protein 3	N-Shc|NSHC|RAI|SHCC	9	NaturalKiller_Cell_Cytotoxicity
55558	PLXNA3	plexin A3	6.3|HSSEXGENE|PLEXIN-A3|PLXN3|PLXN4|SEX|XAP-6	X	Chemokine_Receptors
55937	APOM	apolipoprotein M	G3a|HSPC336|MGC22400|NG20	6	Antimicrobials
56005	C19orf10	chromosome 19 open reading frame 10	EUROIMAGE1875335|IL25|IL27|IL27w|R33729_1|SF20	19	Cytokines
56829	ZC3HAV1	zinc finger CCCH-type, antiviral 1	DKFZp686F2052|DKFZp686H1869|DKFZp686O19171|FLB6421|FLJ13288|MGC48898|ZAP|ZC3H2|ZC3HDC2	7	Antimicrobials
57007	CXCR7	chemokine (C-X-C motif) receptor 7	CMKOR1|GPR159|RDC1	2	Chemokine_Receptors
57144	PAK7	p21 protein (Cdc42/Rac)-activated kinase 7	KIAA1264|MGC26232|PAK5	20	TCRsignalingPathway
57152	SLURP1	secreted LY6/PLAUR domain containing 1	ANUP|ARS|ArsB|LY6LS|MDM	8	Cytokines
57556	SEMA6A	sema domain, transmembrane domain (TM), and cytoplasmic domain, (semaphorin) 6A	HT018|KIAA1368|SEMA|SEMA6A1|SEMAQ|VIA	5	Chemokines
60489	APOBEC3G	apolipoprotein B mRNA editing enzyme, catalytic polypeptide-like 3G	ARP9|CEM15|FLJ12740|MDS019|bK150C2.7|dJ494G10.1	22	Antimicrobials
64135	IFIH1	interferon induced with helicase C domain 1	Hlcd|IDDM19|MDA-5|MDA5|MGC133047	2	Antimicrobials
64714	PDIA2	protein disulfide isomerase family A, member 2	PDA2|PDI|PDIP|PDIR	16	Antigen_Processing_and_Presentation
79026	AHNAK	AHNAK nucleoprotein	AHNAKRS|MGC5395	11	Antimicrobials
79602	ADIPOR2	adiponectin receptor 2	ACDCR2|FLJ21432|MGC4640|PAQR2	12	Cytokine_Receptors
81875	ISG20L2	interferon stimulated exonuclease gene 20kDa-like 2	FLJ12671	1	Antimicrobials
91543	RSAD2	radical S-adenosyl methionine domain containing 2	2510004L01Rik|cig33|cig5|vig1	2	Antimicrobials
115653	KIR3DL3	killer cell immunoglobulin-like receptor, three domains, long cytoplasmic tail, 3	CD158Z|KIR3DL7|KIR44|KIRC1	19	Antigen_Processing_and_Presentation
164656	TMPRSS6	transmembrane protease, serine 6	IRIDA	22	Antimicrobials
200081	TXLNA	taxilin alpha	DKFZp451J0118|IL14|MGC118870|MGC118871|RP4-622L5.4|TXLN	1	Cytokines
259197	NCR3	natural cytotoxicity triggering receptor 3	1C7|CD337|LY117|MALS|NKp30	6	NaturalKiller_Cell_Cytotoxicity
